# Supplementary material for: Relating the composition and interface interactions in the hard corona of gold nanoparticles to the induced response mechanisms in living cells
Source: Royal Society of Chemistry journal article supplement (doi:10.1039/d0nr03581e), 2020-01-01
Supplement: d0nr03581e2.xlsx [file d0nr03581e2.xlsx]

## Sheet: Table S1
Protein summary of the hard corona extracted from HCT-116 cells
Fragment data by excised gel segments are shown in separate worksheets (HCT-116_1-8) corresponding to Figure 1 left green bars low-kDa to high-kDa.
Accession #	Entity	Name
P31946	Homo sapiens	14-3-3 protein beta/alpha
Q16698	Homo sapiens	2,4-dienoyl-CoA reductase, mitochondrial
P46783	Homo sapiens	40S ribosomal protein S10
P62280	Homo sapiens	40S ribosomal protein S11
P25398	Homo sapiens	40S ribosomal protein S12
P62277	Homo sapiens	40S ribosomal protein S13
P62263	Homo sapiens	40S ribosomal protein S14
P62841	Homo sapiens	40S ribosomal protein S15
P62244	Homo sapiens	40S ribosomal protein S15a
P62249	Homo sapiens	40S ribosomal protein S16
P08708	Homo sapiens	40S ribosomal protein S17
P62269	Homo sapiens	40S ribosomal protein S18
P39019	Homo sapiens	40S ribosomal protein S19
P15880	Homo sapiens	40S ribosomal protein S2
P60866	Homo sapiens	40S ribosomal protein S20
P63220	Homo sapiens	40S ribosomal protein S21
P62266	Homo sapiens	40S ribosomal protein S23
P62847	Homo sapiens	40S ribosomal protein S24
P62851	Homo sapiens	40S ribosomal protein S25
P62854	Homo sapiens	40S ribosomal protein S26
P42677	Homo sapiens	40S ribosomal protein S27
P62857	Homo sapiens	40S ribosomal protein S28
P62273	Homo sapiens	40S ribosomal protein S29
P23396	Homo sapiens	40S ribosomal protein S3
P61247	Homo sapiens	40S ribosomal protein S3a
P62701	Homo sapiens	40S ribosomal protein S4, X isoform
P46782	Homo sapiens	40S ribosomal protein S5
P62753	Homo sapiens	40S ribosomal protein S6
P62081	Homo sapiens	40S ribosomal protein S7
P62241	Homo sapiens	40S ribosomal protein S8
P46781	Homo sapiens	40S ribosomal protein S9
P08865	Homo sapiens	40S ribosomal protein SA
P10809	Homo sapiens	60 kDa heat shock protein, mitochondrial
P05388	Homo sapiens	60S acidic ribosomal protein P0
P05387	Homo sapiens	60S acidic ribosomal protein P2
P27635	Homo sapiens	60S ribosomal protein L10
P62906	Homo sapiens	60S ribosomal protein L10a
P62913	Homo sapiens	60S ribosomal protein L11
P30050	Homo sapiens	60S ribosomal protein L12
P26373	Homo sapiens	60S ribosomal protein L13
P40429	Homo sapiens	60S ribosomal protein L13a
P50914	Homo sapiens	60S ribosomal protein L14
P61313	Homo sapiens	60S ribosomal protein L15
P18621	Homo sapiens	60S ribosomal protein L17
Q07020	Homo sapiens	60S ribosomal protein L18
Q02543	Homo sapiens	60S ribosomal protein L18a
P84098	Homo sapiens	60S ribosomal protein L19
P46778	Homo sapiens	60S ribosomal protein L21
P35268	Homo sapiens	60S ribosomal protein L22
Q6P5R6	Homo sapiens	60S ribosomal protein L22-like 1
P62829	Homo sapiens	60S ribosomal protein L23
P62750	Homo sapiens	60S ribosomal protein L23a
P83731	Homo sapiens	60S ribosomal protein L24
P61254	Homo sapiens	60S ribosomal protein L26
P61353	Homo sapiens	60S ribosomal protein L27
P46776	Homo sapiens	60S ribosomal protein L27a
P46779	Homo sapiens	60S ribosomal protein L28
P47914	Homo sapiens	60S ribosomal protein L29
P39023	Homo sapiens	60S ribosomal protein L3
P62888	Homo sapiens	60S ribosomal protein L30
P62899	Homo sapiens	60S ribosomal protein L31
P49207	Homo sapiens	60S ribosomal protein L34
P42766	Homo sapiens	60S ribosomal protein L35
Q9Y3U8	Homo sapiens	60S ribosomal protein L36
P83881	Homo sapiens	60S ribosomal protein L36a
P61927	Homo sapiens	60S ribosomal protein L37
P61513	Homo sapiens	60S ribosomal protein L37a
P63173	Homo sapiens	60S ribosomal protein L38
P36578	Homo sapiens	60S ribosomal protein L4
P46777	Homo sapiens	60S ribosomal protein L5
Q02878	Homo sapiens	60S ribosomal protein L6
P18124	Homo sapiens	60S ribosomal protein L7
P62424	Homo sapiens	60S ribosomal protein L7a
P62917	Homo sapiens	60S ribosomal protein L8
P32969	Homo sapiens	60S ribosomal protein L9
P60709	Homo sapiens	Actin, cytoplasmic 1
P12236	Homo sapiens	ADP/ATP translocase 3
P40222	Homo sapiens	Alpha-taxilin
Q9NQW6	Homo sapiens	Anillin
P07355	Homo sapiens	Annexin A2
O95782	Homo sapiens	AP-2 complex subunit alpha-1
Q9NVI7	Homo sapiens	ATPase family AAA domain-containing protein 3A
P28288	Homo sapiens	ATP-binding cassette sub-family D member 3
Q9UG63	Homo sapiens	ATP-binding cassette sub-family F member 2
Q08211	Homo sapiens	ATP-dependent RNA helicase A
Q92499	Homo sapiens	ATP-dependent RNA helicase DDX1
O00571	Homo sapiens	ATP-dependent RNA helicase DDX3X
Q7L2E3	Homo sapiens	ATP-dependent RNA helicase DHX30
O95816	Homo sapiens	BAG family molecular chaperone regulator 2
O75531	Homo sapiens	Barrier-to-autointegration factor
Q14444	Homo sapiens	Caprin-1
Q14444	Homo sapiens	Caprin-1
Q9H3Q1	Homo sapiens	Cdc42 effector protein 4
Q9NX58	Homo sapiens	Cell growth-regulating nucleolar protein
Q7Z7K6	Homo sapiens	Centromere protein V
Q8TD26	Homo sapiens	Chromodomain-helicase-DNA-binding protein 6
Q5JU67	Homo sapiens	Cilia- and flagella-associated protein 157
Q00610	Homo sapiens	Clathrin heavy chain 1
P09496	Homo sapiens	Clathrin light chain A
Q07021	Homo sapiens	Complement component 1 Q subcomponent-binding protein, mitochondrial
P12532	Homo sapiens	Creatine kinase U-type, mitochondrial
P31930	Homo sapiens	Cytochrome b-c1 complex subunit 1, mitochondrial
P22695	Homo sapiens	Cytochrome b-c1 complex subunit 2, mitochondrial
P47985	Homo sapiens	Cytochrome b-c1 complex subunit Rieske, mitochondrial
P00403	Homo sapiens	Cytochrome c oxidase subunit 2
P20674	Homo sapiens	Cytochrome c oxidase subunit 5A, mitochondrial
P09669	Homo sapiens	Cytochrome c oxidase subunit 6C
P14406	Homo sapiens	Cytochrome c oxidase subunit 7A2, mitochondrial
P08574	Homo sapiens	Cytochrome c1, heme protein, mitochondrial
Q07065	Homo sapiens	Cytoskeleton-associated protein 4
P49902	Homo sapiens	Cytosolic purine 5'-nucleotidase
Q96N67	Homo sapiens	Dedicator of cytokinesis protein 7
P81605	Homo sapiens	Dermcidin
Q9Y295	Homo sapiens	Developmentally-regulated GTP-binding protein 1
P78527	Homo sapiens	DNA-dependent protein kinase catalytic subunit
P31689	Homo sapiens	DnaJ homolog subfamily A member 1
Q9UBS4	Homo sapiens	DnaJ homolog subfamily B member 11
P39656	Homo sapiens	Dolichyl-diphosphooligosaccharide--protein glycosyltransferase 48 kDa subunit
P04843	Homo sapiens	Dolichyl-diphosphooligosaccharide--protein glycosyltransferase subunit 1
P04844	Homo sapiens	Dolichyl-diphosphooligosaccharide--protein glycosyltransferase subunit 2
Q15717	Homo sapiens	ELAV-like protein 1
P68104	Homo sapiens	Elongation factor 1-alpha 1
P24534	Homo sapiens	Elongation factor 1-beta
P29692	Homo sapiens	Elongation factor 1-delta
P26641	Homo sapiens	Elongation factor 1-gamma
P50402	Homo sapiens	Emerin
O60869	Homo sapiens	Endothelial differentiation-related factor 1
O75477	Homo sapiens	Erlin-1
P60842	Homo sapiens	Eukaryotic initiation factor 4A-I
P15170	Homo sapiens	Eukaryotic peptide chain release factor GTP-binding subunit ERF3A
P62495	Homo sapiens	Eukaryotic peptide chain release factor subunit 1
P47813	Homo sapiens	Eukaryotic translation initiation factor 1A, X-chromosomal
P05198	Homo sapiens	Eukaryotic translation initiation factor 2 subunit 1
P20042	Homo sapiens	Eukaryotic translation initiation factor 2 subunit 2
P41091	Homo sapiens	Eukaryotic translation initiation factor 2 subunit 3
Q14152	Homo sapiens	Eukaryotic translation initiation factor 3 subunit A
P55884	Homo sapiens	Eukaryotic translation initiation factor 3 subunit B
Q99613	Homo sapiens	Eukaryotic translation initiation factor 3 subunit C
O15371	Homo sapiens	Eukaryotic translation initiation factor 3 subunit D
P60228	Homo sapiens	Eukaryotic translation initiation factor 3 subunit E
O00303	Homo sapiens	Eukaryotic translation initiation factor 3 subunit F
Q13347	Homo sapiens	Eukaryotic translation initiation factor 3 subunit I
Q9UBQ5	Homo sapiens	Eukaryotic translation initiation factor 3 subunit K
Q9Y262	Homo sapiens	Eukaryotic translation initiation factor 3 subunit L
Q04637	Homo sapiens	Eukaryotic translation initiation factor 4 gamma 1
P78344	Homo sapiens	Eukaryotic translation initiation factor 4 gamma 2
P06730	Homo sapiens	Eukaryotic translation initiation factor 4E
P55010	Homo sapiens	Eukaryotic translation initiation factor 5
P63241	Homo sapiens	Eukaryotic translation initiation factor 5A-1
O60841	Homo sapiens	Eukaryotic translation initiation factor 5B
P15311	Homo sapiens	Ezrin
Q9Y5B9	Homo sapiens	FACT complex subunit SPT16
Q92945	Homo sapiens	Far upstream element-binding protein 2
P51114	Homo sapiens	Fragile X mental retardation syndrome-related protein 1
P51116	Homo sapiens	Fragile X mental retardation syndrome-related protein 2
P00367	Homo sapiens	Glutamate dehydrogenase 1, mitochondrial
P04406	Homo sapiens	Glyceraldehyde-3-phosphate dehydrogenase
P30419	Homo sapiens	Glycylpeptide N-tetradecanoyltransferase 1
Q99988	Homo sapiens	Growth/differentiation factor 15
P62873	Homo sapiens	Guanine nucleotide-binding protein G(I)/G(S)/G(T) subunit beta-1
P09471	Homo sapiens	Guanine nucleotide-binding protein G(o) subunit alpha
P11142	Homo sapiens	Heat shock cognate 71 kDa protein
Q12931	Homo sapiens	Heat shock protein 75 kDa, mitochondrial
P04792	Homo sapiens	Heat shock protein beta-1
P02081	Bos taurus	Hemoglobin fetal subunit beta
P01966	Bos taurus	Hemoglobin subunit alpha
Q13151	Homo sapiens	Heterogeneous nuclear ribonucleoprotein A0
P09651	Homo sapiens	Heterogeneous nuclear ribonucleoprotein A1
B2RXH8	Homo sapiens	Heterogeneous nuclear ribonucleoprotein C-like 1
Q14103	Homo sapiens	Heterogeneous nuclear ribonucleoprotein D0
O14979	Homo sapiens	Heterogeneous nuclear ribonucleoprotein D-like
P31943	Homo sapiens	Heterogeneous nuclear ribonucleoprotein H
P61978	Homo sapiens	Heterogeneous nuclear ribonucleoprotein K
O60506	Homo sapiens	Heterogeneous nuclear ribonucleoprotein Q
Q00839	Homo sapiens	Heterogeneous nuclear ribonucleoprotein U
P22626	Homo sapiens	Heterogeneous nuclear ribonucleoproteins A2/B1
P07910	Homo sapiens	Heterogeneous nuclear ribonucleoproteins C1/C2
P26583	Homo sapiens	High mobility group protein B2
P16403	Homo sapiens	Histone H1.2
P04908	Homo sapiens	Histone H2A type 1-B/E
P62807	Homo sapiens	Histone H2B type 1-C/E/F/G/I
Q6NXT2	Homo sapiens	Histone H3.3C
P62805	Homo sapiens	Histone H4
Q86YZ3	Homo sapiens	Hornerin
O00425	Homo sapiens	Insulin-like growth factor 2 mRNA-binding protein 3
P19525	Homo sapiens	Interferon-induced, double-stranded RNA-activated protein kinase
Q12905	Homo sapiens	Interleukin enhancer-binding factor 2
Q12906	Homo sapiens	Interleukin enhancer-binding factor 3
Q96CN7	Homo sapiens	Isochorismatase domain-containing protein 1
O00515	Homo sapiens	Ladinin-1
P42166	Homo sapiens	Lamina-associated polypeptide 2, isoform alpha
Q6PKG0	Homo sapiens	La-related protein 1
Q96AG4	Homo sapiens	Leucine-rich repeat-containing protein 59
Q13724	Homo sapiens	Mannosyl-oligosaccharide glucosidase
O15479	Homo sapiens	Melanoma-associated antigen B2
O14880	Homo sapiens	Microsomal glutathione S-transferase 3
O96008	Homo sapiens	Mitochondrial import receptor subunit TOM40 homolog
Q9UKX3	Homo sapiens	Myosin-13
Q16795	Homo sapiens	NADH dehydrogenase [ubiquinone] 1 alpha subcomplex subunit 9, mitochondrial
O96000	Homo sapiens	NADH dehydrogenase [ubiquinone] 1 beta subcomplex subunit 10
P49821	Homo sapiens	NADH dehydrogenase [ubiquinone] flavoprotein 1, mitochondrial
P19404	Homo sapiens	NADH dehydrogenase [ubiquinone] flavoprotein 2, mitochondrial
O75489	Homo sapiens	NADH dehydrogenase [ubiquinone] iron-sulfur protein 3, mitochondrial
P28331	Homo sapiens	NADH-ubiquinone oxidoreductase 75 kDa subunit, mitochondrial
P41227	Homo sapiens	N-alpha-acetyltransferase 10
Q9BXJ9	Homo sapiens	N-alpha-acetyltransferase 15, NatA auxiliary subunit
Q9GZZ1	Homo sapiens	N-alpha-acetyltransferase 50
Q13765	Homo sapiens	Nascent polypeptide-associated complex subunit alpha
Q09666	Homo sapiens	Neuroblast differentiation-associated protein AHNAK
Q9UH03	Homo sapiens	Neuronal-specific septin-3
Q9HAN9	Homo sapiens	Nicotinamide/nicotinic acid mononucleotide adenylyltransferase 1
Q15233	Homo sapiens	Non-POU domain-containing octamer-binding protein
Q09161	Homo sapiens	Nuclear cap-binding protein subunit 1
P67809	Homo sapiens	Nuclease-sensitive element-binding protein 1
P19338	Homo sapiens	Nucleolin
P06748	Homo sapiens	Nucleophosmin
P15531	Homo sapiens	Nucleoside diphosphate kinase A
Q8NGZ3	Homo sapiens	Olfactory receptor 13G1
P23284	Homo sapiens	Peptidyl-prolyl cis-trans isomerase B
Q00688	Homo sapiens	Peptidyl-prolyl cis-trans isomerase FKBP3
P51659	Homo sapiens	Peroxisomal multifunctional enzyme type 2
Q9Y285	Homo sapiens	Phenylalanine--tRNA ligase alpha subunit
Q9NSD9	Homo sapiens	Phenylalanine--tRNA ligase beta subunit
Q8NC51	Homo sapiens	Plasminogen activator inhibitor 1 RNA-binding protein
Q15149	Homo sapiens	Plectin
P09874	Homo sapiens	Poly [ADP-ribose] polymerase 1
Q15365	Homo sapiens	Poly(rC)-binding protein 1
Q15366	Homo sapiens	Poly(rC)-binding protein 2
P11940	Homo sapiens	Polyadenylate-binding protein 1
P26599	Homo sapiens	Polypyrimidine tract-binding protein 1
Q8TCS8	Homo sapiens	Polyribonucleotide nucleotidyltransferase 1, mitochondrial
P02545	Homo sapiens	Prelamin-A/C
P17844	Homo sapiens	Probable ATP-dependent RNA helicase DDX5
P26196	Homo sapiens	Probable ATP-dependent RNA helicase DDX6
P35232	Homo sapiens	Prohibitin
Q99623	Homo sapiens	Prohibitin-2
Q9UQ80	Homo sapiens	Proliferation-associated protein 2G4
Q9P258	Homo sapiens	Protein RCC2
Q96FQ6	Homo sapiens	Protein S100-A16
Q8TF72	Homo sapiens	Protein Shroom3
P60468	Homo sapiens	Protein transport protein Sec61 subunit beta
P32322	Homo sapiens	Pyrroline-5-carboxylate reductase 1, mitochondrial
Q13283	Homo sapiens	Ras GTPase-activating protein-binding protein 1
Q9UN86	Homo sapiens	Ras GTPase-activating protein-binding protein 2
P61026	Homo sapiens	Ras-related protein Rab-10
P63244	Homo sapiens	Receptor of activated protein C kinase 1
Q92900	Homo sapiens	Regulator of nonsense transcripts 1
P35244	Homo sapiens	Replication protein A 14 kDa subunit
P27694	Homo sapiens	Replication protein A 70 kDa DNA-binding subunit
Q6ZSZ5	Homo sapiens	Rho guanine nucleotide exchange factor 18
Q9Y224	Homo sapiens	RNA transcription, translation and transport factor protein
P35637	Homo sapiens	RNA-binding protein FUS
Q9NVA2	Homo sapiens	Septin-11
Q15019	Homo sapiens	Septin-2
Q16181	Homo sapiens	Septin-7
Q9UHD8	Homo sapiens	Septin-9
Q9UHD8	Homo sapiens	Septin-9
Q07955	Homo sapiens	Serine/arginine-rich splicing factor 1
Q01130	Homo sapiens	Serine/arginine-rich splicing factor 2
P84103	Homo sapiens	Serine/arginine-rich splicing factor 3
Q08170	Homo sapiens	Serine/arginine-rich splicing factor 4
Q5VT25	Homo sapiens	Serine/threonine-protein kinase MRCK alpha
Q96HS1	Homo sapiens	Serine/threonine-protein phosphatase PGAM5, mitochondrial
P37108	Homo sapiens	Signal recognition particle 14 kDa protein
P49458	Homo sapiens	Signal recognition particle 9 kDa protein
Q9UHB9	Homo sapiens	Signal recognition particle subunit SRP68
O76094	Homo sapiens	Signal recognition particle subunit SRP72
ENSBTAP00000011213	Bos taurus	similar to apolipoprotein B, partial
Q04837	Homo sapiens	Single-stranded DNA-binding protein, mitochondrial
P26368	Homo sapiens	Splicing factor U2AF 65 kDa subunit
P23246	Homo sapiens	Splicing factor, proline- and glutamine-rich
Q7KZF4	Homo sapiens	Staphylococcal nuclease domain-containing protein 1
Q9UJZ1	Homo sapiens	Stomatin-like protein 2, mitochondrial
P38646	Homo sapiens	Stress-70 protein, mitochondrial
Q99470	Homo sapiens	Stromal cell-derived factor 2
Q9HCN8	Homo sapiens	Stromal cell-derived factor 2-like protein 1
Q12824	Homo sapiens	SWI/SNF-related matrix-associated actin-dependent regulator of chromatin subfamily B member 1
P17987	Homo sapiens	T-complex protein 1 subunit alpha
P78371	Homo sapiens	T-complex protein 1 subunit beta
P50991	Homo sapiens	T-complex protein 1 subunit delta
P48643	Homo sapiens	T-complex protein 1 subunit epsilon
Q99832	Homo sapiens	T-complex protein 1 subunit eta
P49368	Homo sapiens	T-complex protein 1 subunit gamma
P50990	Homo sapiens	T-complex protein 1 subunit theta
P40227	Homo sapiens	T-complex protein 1 subunit zeta
Q86V81	Homo sapiens	THO complex subunit 4
P20290	Homo sapiens	Transcription factor BTF3
Q8NI51	Homo sapiens	Transcriptional repressor CTCFL
P43307	Homo sapiens	Translocon-associated protein subunit alpha
P51571	Homo sapiens	Translocon-associated protein subunit delta
P68363	Homo sapiens	Tubulin alpha-1B chain
P07437	Homo sapiens	Tubulin beta chain
Q14694	Homo sapiens	Ubiquitin carboxyl-terminal hydrolase 10
Q14157	Homo sapiens	Ubiquitin-associated protein 2-like
O75821	Homo sapiens	ukaryotic translation initiation factor 3 subunit G
E9PRG8	Homo sapiens	Uncharacterized protein C11orf98
Q8IV33	Homo sapiens	Uncharacterized protein KIAA0825
Q9P0L0	Homo sapiens	Vesicle-associated membrane protein-associated protein A
Q3ZBS7	Bos taurus	Vitronectin
P21796	Homo sapiens	Voltage-dependent anion-selective channel protein 1
P45880	Homo sapiens	Voltage-dependent anion-selective channel protein 2
P13010	Homo sapiens	X-ray repair cross-complementing protein 5
P12956	Homo sapiens	X-ray repair cross-complementing protein 6
Q8WU90	Homo sapiens	Zinc finger CCCH domain-containing protein 15

## Sheet: HCT116_1
ID	Entity	Name	Sequence coverage		Score	Mass	Peptide	Observed	Charge (+)
P00761	Sus scrofa	Trypsin	58/231 residues	0.2511	634	24394	R.VATVSLPR.S	421.743	2
							K.LSSPATLNSR.V	523.266	2
							R.LGEHNIDVLEGNEQFINAAK.I	737.68	3
							K.IITHPNFNGNTLDNDIMLIK.L	762.039	3
							R.LGEHNIDVLEGNEQFINAAK.I	1106.52	2
P02081	Bos taurus	Hemoglobin fetal subunit beta	63/145 residues	0.4345	270	15849	K.VVTGVANALAHR.Y	403.221	3
							K.VDEVGGEALGR.L	551.26	2
							K.AAVTSLFAK.V	454.25	2
							R.LLGNVLVVVLAR.R	633.397	2
							R.FFESFGDLSSADAILGNPK.V	672.641	3
							R.FFESFGDLSSADAILGNPK.V	1007.95	2
P63220	Homo sapiens	40S ribosomal protein S21	24/83 residues	0.2892	144	9106	K.DHASIQMNVAEVDK.V	519.565	3
							R.MGESDDSILR.L	561.738	2
P62857	Homo sapiens	40S ribosomal protein S28	21/69 residues	0.3043	143	7836	R.VEFMDDTSR.S	550.22	2
							R.EGDVLTLLESER.E	454.221	3
							R.EGDVLTLLESER.E	680.828	2
P62805	Homo sapiens	Histone H4	44/103 residues	0.4272	131	11360	R.DNIQGITKPAIR.R	442.573	3
							R.DAVTYTEHAK.R	567.753	2
							R.ISGLIYEETR.G	590.792	2
							K.TVTAMDVVYALK.R	655.832	2
P63173	Homo sapiens	60S ribosomal protein L38	22/70 residues	0.0314	104	8213	K.IEEIKDFLLTAR.R	483.26	3
							R.YLYTLVITDK.E	614.823	2
O75531	Homo sapiens	Barrier-to-autointegration factor	43/89 residues	0.4831	95	10052	K.KDEDLFR.E	461.718	2
							K.AYVVLGQFLVLK.K	450.597	3
							K.AYVVLGQFLVLK.K	675.39	2
							R.DFVAEPMGEKPVGSLAGIGEVLGK.K	800.724	3
P62273	Homo sapiens	40S ribosomal protein S29	11/56 residues	0.1964	85	6672	M.GHQQLYWSHPR.K	470.216	3
P61513	Homo sapiens	60S ribosomal protein L37a	18/92 residues	0.1957	82	10268	K.TVAGGAWTYNTTSAVTVK.S	609.625	3
							K.TVAGGAWTYNTTSAVTVK.S	914.434	2
P01966	Bos taurus	Hemoglobin subunit alpha	36/142 residues	0.2535	76	15175	K.VGGHAAEYGAEALER.M	510.564	3
							R.MFLSFPTTK.T	536.261	2
							K.FLANVSTVLTSK.Y	640.345	2
P14406	Homo sapiens	Cytochrome c oxidase subunit 7A2, mitochondrial	23/83 residues	0.2771	71	9390	K.GGVADALLYR.A	517.767	2
							K.LFQEDDEIPLYLK.G	811.891	2
P35244	Homo sapiens	Replication protein A 14 kDa subunit	27/121 residues	0.2231	67	13560	K.MFILSDGEGK.N	548.749	2
							K.IIHDFPQFYPLGIVQHD.-	680.661	3
Q96FQ6	Homo sapiens	Protein S100-A16	11/103 residues	0.1068	60	11794	K.AVIVLVENFYK.Y	647.852	2
P06748	Homo sapiens	Nucleophosmin	23/294 residues	0.0782	60	32555	R.GPSSVEDIK.A	466.223	2
							R.MTDQEAIQDLWQWR.K	607.598	3
P42677	Homo sapiens	40S ribosomal protein S27	12/84 residues	0.1429	58	9455	K.DLLHPSPEEEK.R	431.867	3
							K.DLLHPSPEEEKR.K	483.898	3
							K.DLLHPSPEEEK.R	647.296	2
P68104	Homo sapiens	Elongation factor 1-alpha 1	12/462 residues	0.026	57	50109	K.YYVTIIDAPGHR.D	468.897	3
Q8TD26	Homo sapiens	Chromodomain-helicase-DNA-binding protein 6	11/2715 residues	0.0041	53	305220	K.HDRDLLIGTAK.H	413.253	3
Q8TF72	Homo sapiens	Protein Shroom3	9/1996 residues	0.0045	50	216724	R.SSPATADKR.Q	466.726	2
P81605	Homo sapiens	Dermcidin	22/110 residues	0.2	46	11277	K.ENAGEDPGLAR.Q	564.747	2
							K.DAVEDLESVGK.G	581.261	2
P49458	Homo sapiens	Signal recognition particle 9 kDa protein	8/86 residues	0.093	45	10105	K.LYLADPMK.A	475.738	2
P09669	Homo sapiens	Cytochrome c oxidase subunit 6C	8/75 residues	0.1067	43	8776	K.AGIFQSVK.-	425.23	2
Q86YZ3	Homo sapiens	Hornerin	16/2850 residues	0.0056	41	282228	R.GPYESGSGHSSGLGHR.E	528.89	3

## Sheet: HCT116_2
ID	Entity	Name	Sequence coverage		Score	Mass	Peptide	Observed	Charge (+)
P00761	Sus scrofa	Trypsin	58/231 residues	0.2511	668	24394	K.LSSPATLNSR.V	523.268	2
							R.VATVSLPR.S	421.744	2
							R.LGEHNIDVLEGNEQFINAAK.I	738.014	3
							R.LGEHNIDVLEGNEQFINAAK.I	1106.01	2
							K.IITHPNFNGNTLDNDIMLIK.L	762.038	3
P46783	Homo sapiens	40S ribosomal protein S10	69/165 residues	0.4182	418	18886	K.HPELADK.N	405.198	2
							R.SAVPPGADK.K	421.21	2
							K.AEAGAGSATEFQFR.G	481.213	3
							K.AEAGAGSATEFQFR.G	721.315	2
							R.IAIYELLFK.E	555.313	2
							R.DYLHLPPEIVPATLR.R	578.636	3
							R.HFYWYLTNEGIQYLR.D	668.308	3
P63241	Homo sapiens	Eukaryotic translation initiation factor 5A-1	44/154 residues	0.2857	344	16821	K.IVEMSTSK.T	447.719	2
							K.VHLVGIDIFTGK.K	433.572	3
							K.VHLVGIDIFTGK.K	649.855	2
							R.NDFQLIGIQDGYLSLLQDSGEVR.E	861.07	3
							K.RNDFQLIGIQDGYLSLLQDSGEVR.E	913.101	3
P62841	Homo sapiens	40S ribosomal protein S15	53/145 residues	0.3655	280	17029	K.EAPPMEKPEVVK.T	451.893	3
							R.DMIILPEMVGSMVGVYNGK.T	685.319	3
							R.GVDLDQLLDMSYEQLMQLYSAR.Q	863.719	3
P62249	Homo sapiens	40S ribosomal protein S16	52/146 residues	0.3562	264	16435	K.YVDEASK.K	406.181	2
							K.ALVAYYQK.Y	478.249	2
							R.TLLVADPR.R	442.749	2
							K.DILIQYDR.T	518.26	2
							K.GPLQSVQVFGR.K	594.31	2
							K.LLEPVLLLGK.E	547.842	2
P62269	Homo sapiens	40S ribosomal protein S18	73/152 residues	0.4803	262	17708	R.YAHVVLR.K	429.239	2
							R.KADIDLTK.R	452.245	2
							R.VLNTNIDGR.R	501.256	2
							R.AGELTEDEVER.V	624.27	2
							K.IAFAITAIK.G	474.283	2
							R.VITIMQNPR.Q	536.287	2
							K.YSQVLANGLDNK.L	661.318	2
							K.IPDWFLNR.Q	530.762	2
P05387	Homo sapiens	60S acidic ribosomal protein P2	55/115 residues	0.4783	256	11658	K.VISELNGK.N	430.234	2
							K.NIEDVIAQGIGK.L	419.552	3
							K.NIEDVIAQGIGK.L	628.823	2
							K.ILDSVGIEADDDR.L	709.32	2
							R.YVASYLLAALGGNSSPSAK.D	623.64	3
							R.YVASYLLAALGGNSSPSAK.D	935.456	2
P39019	Homo sapiens	40S ribosomal protein S19	53/145 residues	0.3655	246	16051	R.GGAGVGSMTK.I	432.701	2
							R.IAGQVAAANK.K	471.756	2
							K.LKVPEWVDTVK.L	438.573	3
							R.VLQALEGLK.M	485.784	2
							K.VPEWVDTVK.L	536.769	2
							K.ELAPYDENWFYTR.A	852.858	2
P62750	Homo sapiens	60S ribosomal protein L23a	47/156 residues	0.3013	227	17684	K.VNTLIRPDGEK.K	414.553	3
							K.VNTLIRPDGEK.K	621.325	2
							K.LYDIDVAK.V	468.74	2
							R.LAPDYDALDVANK.I	468.889	3
							R.LAPDYDALDVANK.I	702.831	2
							K.KIEDNNTLVFIVDVK.A	583.306	3
							K.IEDNNTLVFIVDVK.A	810.409	2
P62263	Homo sapiens	40S ribosomal protein S14	55/151 residues	0.3642	209	16263	K.TPGPGAQSALR.A	527.767	2
							K.ELGITALHIK.L	547.814	2
							R.DESSPYAAMLAAQDVAQR.C	641.947	3
							R.IEDVTPIPSDSTR.R	715.338	2
							K.ADRDESSPYAAMLAAQDVAQR.C	756	3
P62851	Homo sapiens	40S ribosomal protein S25	35/125 residues	0.28	183	13734	R.AQVIYTR.N	425.729	2
							R.AALQELLSK.G	486.774	2
							K.LNNLVLFDK.A	538.292	2
							K.LITPAVVSER.L	542.803	2
P83731	Homo sapiens	60S ribosomal protein L24	45/157 residues	0.2866	166	17768	K.IYPGHGR.R	400.201	2
							K.GQSEEIQK.K	459.715	2
							K.VFQFLNAK.C	483.758	2
							R.AITGASLADIMAK.R	631.322	2
							R.QINWTVLYR.R	596.806	2
P62244	Homo sapiens	40S ribosomal protein S15a	49/130 residues	0.3769	162	14830	R.FLTVMMK.H	435.222	2
							K.IVVNLTGR.L	436.258	2
							K.HGYIGEFEIIDDHR.A	567.587	3
							R.QFGFIVLTTSAGIMDHEEAR.R	741.674	3
P62899	Homo sapiens	60S ribosomal protein L31	42/125 residues	0.336	159	14454	R.SAINEVVTR.E	494.758	2
							R.NEDEDSPNK.L	524.197	2
							K.NLQTVNVDEN.-	1145.5	1
							K.LYTLVTYVPVTTFK.N	822.934	2
P62913	Homo sapiens	60S ribosomal protein L11	52/178 residues	0.2921	151	20240	K.AEEILEK.G	416.213	2
							K.YDGIILPGK.-	488.263	2
							K.VLEQLTGQTPVFSK.A	516.27	3
							K.VLEQLTGQTPVFSK.A	773.902	2
							K.NNFSDTGNFGFGIQEHIDLGIK.Y	808.362	3
P62807	Homo sapiens	Histone H2B type 1-C/E/F/G/I	39/126 residues	0.3095	149	13898	R.EIQTAVR.L	408.718	2
							K.HAVSEGTK.A	414.7	2
							K.ESYSVYVYK.V	569.257	2
							K.AMGIMNSFVNDIFER.I	581.924	3
							K.AMGIMNSFVNDIFER.I	872.881	2
P04908	Homo sapiens	Histone H2A type 1-B/E	71/130 residues	0.5461	145	14127	R.NDEELNK.L	431.187	2
							R.HLQLAIR.N	425.753	2
							R.AGLQFPVGR.V	472.755	2
							R.VTIAQGGVLPNIQAVLLPK.K	644.704	3
							R.VTIAQGGVLPNIQAVLLPK.K	966.551	2
							R.VGAGAPVYLAAVLEYLTAEILELAGNAAR.D	972.83	3
P23284	Homo sapiens	Peptidyl-prolyl cis-trans isomerase B	73/216 residues	0.338	139	23728	R.IGDEDVGR.V	430.695	2
							K.IEVEKPFAIAK.E	415.566	3
							K.VLEGMEVVR.K	516.265	2
							K.DFMIQGGDFTR.G	643.774	2
							K.TVDNFVALATGEK.G	682.831	2
							K.DTNGSQFFITTVK.T	729.343	2
							R.VIFGLFGK.T	440.752	2
P61353	Homo sapiens	60S ribosomal protein L27	36/136 residues	0.2647	136	15788	R.KVTAAMGK.K	403.221	2
							K.VVLVLAGR.Y	413.766	2
							K.VYNYNHLMPTR.Y	469.884	3
							R.YSVDIPLDK.T	525.262	2
P62280	Homo sapiens	40S ribosomal protein S11	19/158 residues	0.1203	122	18419	R.VLLGETGK.E	408.731	2
							K.EAIEGTYIDKK.C	422.877	3
							K.EAIEGTYIDK.K	569.765	2
P46779	Homo sapiens	60S ribosomal protein L28	18/137 residues	0.1314	116	15738	R.YNGLIHR.K	436.726	2
							K.TVGVEPAADGK.G	522.255	2
P37108	Homo sapiens	Signal recognition particle 14 kDa protein	22/136 residues	0.1618	106	14561	K.ISTVVSSK.E	410.729	2
							M.VLLESEQFLTELTR.L	839.424	2
							M.VLLESEQFLTELTR.L	560.286	3
P62847	Homo sapiens	40S ribosomal protein S24	27/133 residues	0.203	106	15413	K.TTGFGMIYDSLDYAK.K	561.242	3
							K.TTPDVIFVFGFR.T	699.848	2
							K.TTGFGMIYDSLDYAK.K	841.361	2
P62277	Homo sapiens	40S ribosomal protein S13	45/151 residues	0.298	105	17212	R.LILIESR.I	422.255	2
							K.KGLTPSQIGVILR.D	461.274	3
							K.GLSQSALPYR.R	546.277	2
							K.GLTPSQIGVILR.D	627.36	2
							K.GLAPDLPEDLYHLIK.K	565.288	3
P62805	Homo sapiens	Histone H4	22/103 residues	0.2136	96	11360	R.DNIQGITKPAIR.R	442.575	3
							R.ISGLIYEETR.G	590.795	2
P35268	Homo sapiens	60S ribosomal protein L22	24/128 residues	0.1875	92	14778	K.ITVTSEVPFSK.R	604.312	2
							K.AGNLGGGVVTIER.S	621.822	2
P30050	Homo sapiens	60S ribosomal protein L12	24/165 residues	0.1455	90	17808	K.IGPLGLSPK.K	441.263	2
							K.HSGNITFDEIVNIAR.Q	562.605	3
							K.HSGNITFDEIVNIAR.Q	843.903	2
Q9Y3U8	Homo sapiens	60S ribosomal protein L36	20/105 residues	0.1905	87	12246	R.YPMAVGLNK.G	496.748	2
							R.EELSNVLAAMR.K	616.796	2
P62854	Homo sapiens	40S ribosomal protein S26	31/115 residues	0.2696	85	13007	R.GHVQPIR.C	403.722	2
							R.NIVEAAAVR.D	471.756	2
							R.DISEASVFDAYVLPK.L	552.264	3
P42766	Homo sapiens	60S ribosomal protein L35	10/123 residues	0.0813	81	14543	R.VLTVINQTQK.E	572.32	2
Q6P5R6	Homo sapiens	60S ribosomal protein L22-like 1	36/122 residues	0.2951	78	14598	R.VVASDKETYELR.Y	470.565	3
							R.FNLDLTHPVEDGIFDSGNFEQFLR.E	937.752	3
P20674	Homo sapiens	Cytochrome c oxidase subunit 5A, mitochondrial	24/150 residues	0.16	77	16752	R.LNDFASTVR.I	511.75	2
							K.GINTLVTYDMVPEPK.I	838.898	2
P46776	Homo sapiens	60S ribosomal protein L27a	11/148 residues	0.0743	75	16551	K.TGAAPIIDVVR.S	556.308	2
P60866	Homo sapiens	40S ribosomal protein S20	23/119 residues	0.1933	74	13364	K.TPVEPEVAIHR.I	416.55	3
							K.TPVEPEVAIHR.I	624.319	2
							R.LIDLHSPSEIVK.Q	675.862	2
P20290	Homo sapiens	Transcription factor BTF3	44/206 residues	0.2136	74	22154	K.VQASLAANTFTITGHAETK.Q	654.322	3
							K.APLATGEDDDDEVPDLVENFDEASK.N	897.698	3
Q9GZZ1	Homo sapiens	N-alpha-acetyltransferase 50	9/169 residues	0.0533	73	19386	K.FGFEIIETK.K	542.268	2
P46778	Homo sapiens	60S ribosomal protein L21	15/160 residues	0.0938	71	18553	R.VYNVTQHAVGIVVNK.Q	547.624	3
P00403	Homo sapiens	Cytochrome c oxidase subunit 2	33/227 residues	0.1454	71	25548	R.LLDVDNR.V	422.716	2
							R.VVLPIEAPIR.M	553.831	2
							R.ILYMTDEVNDPSLTIK.S	926.94	2
P83881	Homo sapiens	60S ribosomal protein L36a	16/106 residues	0.1509	69	12433	K.DSLYAQGK.R	441.207	2
							K.HFELGGDK.K	451.709	2
P08708	Homo sapiens	40S ribosomal protein S17	43/135 residues	0.3185	66	15540	R.LGNDFHTNKR.V	401.194	3
							K.IAGYVTHLMK.R	566.794	2
							R.RDNYVPEVSALDQEIIEVDPDTK.E	882.736	3
O60869	Homo sapiens	Endothelial differentiation-related factor 1	15/148 residues	0.1014	62	16359	K.INEKPQVIADYESGR.A	573.611	3
P49207	Homo sapiens	60S ribosomal protein L34	16/117 residues	0.1368	59	13284	R.LSYNTASNK.T	499.235	2
							R.IVYLYTK.K	450.251	2
Q6NXT2	Homo sapiens	Histone H3.3C	7/135 residues	0.0519	57	15204	K.STELLIR.K	416.237	2
P62888	Homo sapiens	60S ribosomal protein L30	19/115 residues	0.1652	56	12776	K.SLESINSR.L	453.223	2
							K.SEIEYYAMLAK.T	659.3	2
P62266	Homo sapiens	40S ribosomal protein S23	11/143 residues	0.0769	55	15798	K.VANVSLLALYK.G	595.839	2
P02081	Bos taurus	Hemoglobin fetal subunit beta	12/145 residues	0.0828	52	15849	R.LLGNVLVVVLAR.R	633.395	2
Q04837	Homo sapiens	Single-stranded DNA-binding protein, mitochondrial	23/148 residues	0.1554	49	17249	R.VGQDPVLR.Q	442.24	2
							R.SGDSEVYQLGDVSQK.T	806.35	2
P51571	Homo sapiens	Translocon-associated protein subunit delta	30/173 residues	0.1734	50	18987	R.FFDEESYSLLR.K	703.311	2
							R.NNEDISIIPPLFTVSVDHR.G	723.017	3
P47813	Homo sapiens	Eukaryotic translation initiation factor 1A, X-chromosomal	17/144 residues	0.1181	49	16450	K.YNADEAR.S	419.674	2
							K.EDGQEYAQVIK.M	640.29	2
P60468	Homo sapiens	Protein transport protein Sec61 subunit beta	10/96 residues	0.1042	49	9968	R.FYTEDSPGLK.V	578.761	2
P62829	Homo sapiens	60S ribosomal protein L23	10/140 residues	0.0714	48	14856	K.GSAITGPVAK.E	450.745	2
O14880	Homo sapiens	Microsomal glutathione S-transferase 3	27/152 residues	0.1776	48	16506	R.VLYAYGYYTGEPSK.R	805.86	2
							R.IASGLGLAWIVGR.V	656.865	2
P49902	Homo sapiens	Cytosolic purine 5'-nucleotidase	7/561 residues	0.0125	46	64928	K.TVENLEK.Y	416.213	2
Q5JU67	Homo sapiens	Cilia- and flagella-associated protein 157	12/520 residues	0.0231	46	60496	K.EPVVAVEPPLAK.E	416.55	3
P25398	Homo sapiens	40S ribosomal protein S12	10/132 residues	0.0756	46	14505	K.TALIHDGLAR.G	533.784	2
P61254	Homo sapiens	60S ribosomal protein L26	23/145 residues	0.1586	45	17248	K.IMSSPLSK.E	431.725	2
							K.YKEETIEK.M	520.251	2
							K.YVIYIER.V	478.25	2
E9PRG8	Homo sapiens	Uncharacterized protein C11orf98	13/122 residues	0.1066	44	13790	R.VVGAVIDQGLITR.H	670.876	2
P61927	Homo sapiens	60S ribosomal protein L37	9/97 residues	0.0928	42	11071	R.AAVAASSSS.-	750.336	1
P15531	Homo sapiens	Nucleoside diphosphate kinase A	12/152 residues	0.0789	41	17138	R.TFIAIKPDGVQR.S	448.912	3
Q3ZBS7	Bos taurus	Vitronectin	11/484 residues	0.0227	41	54065	R.RVDAVIPPYPR.S	428.233	3

## Sheet: HCT116_3
ID	Entity	Name	Sequence coverage		Score	Mass	Peptide	Observed	Charge (+)
P00761	Sus scrofa	Trypsin	58/231 residues	0.2511	937	24394	R.VATVSLPR.S	421.743	2
							K.LSSPATLNSR.V	523.267	2
							R.LGEHNIDVLEGNEQFINAAK.I	738.014	3
							K.IITHPNFNGNTLDNDIMLIK.L	762.038	3
							K.IITHPNFNGNTLDNDIMLIK.L	1142.55	2
							R.LGEHNIDVLEGNEQFINAAK.I	1106	2
P46781	Homo sapiens	40S ribosomal protein S9	78/194 residues	0.4021	662	22578	R.IGVLDEGK.M	415.719	2
							R.LQTQVFK.L	432.237	2
							R.ELLTLDEKDPR.R	443.557	3
							K.LIGEYGLR.N	460.747	2
							K.KGQGGAGAGDDEEED.-	717.76	2
							R.KQVVNIPSFIVR.L	467.269	3
							K.LDYILGLK.I	467.766	2
							R.ELLTLDEK.D	480.748	2
							R.LFEGNALLR.R	516.777	2
							K.QVVNIPSFIVR.L	636.353	2
P32969	Homo sapiens	60S ribosomal protein L9	94/192 residues	0.4896	287	21850	R.DFNHINVELSLLGK.K	533.604	3
							R.RDFNHINVELSLLGK.K	585.635	3
							K.FLDGIYVSEK.G	585.784	2
							R.KFLDGIYVSEK.G	649.829	2
							K.TILSNQTVDIPENVDITLK.G	705.359	3
							R.DFNHINVELSLLGK.K	799.9	2
							R.SVYAHFPINVVIQENGSLVEIR.N	829.083	3
							K.DELILEGNDIELVSNSAALIQQATTVK.N	962.476	3
P62081	Homo sapiens	40S ribosomal protein S7	70/194 residues	0.3608	267	22113	K.EIEVGGGR.K	408.701	2
							R.ELNITAAK.E	430.233	2
							K.VETFSGVYK.K	515.246	2
							K.AIIIFVPVPQLK.S	446.608	3
							K.AIIIFVPVPQLK.S	669.408	2
							K.DVNFEFPEFQL.-	692.801	2
							R.TLTAVHDAILEDLVFPSEIVGK.R	790.07	3
							R.TLTAVHDAILEDLVFPSEIVGK.R	1184.6	2
P47914	Homo sapiens	60S ribosomal protein L29	23/159 residues	0.1447	264	17741	R.LAYIAHPK.L	456.753	2
							K.AQAAAPASVPAQAPK.R	459.906	3
							K.AQAAAPASVPAQAPK.R	689.354	2
P46782	Homo sapiens	40S ribosomal protein S5	66/204 residues	0.3235	243	22862	K.GSSNSYAIK.K	463.717	2
							R.QAVDVSPLR.R	492.759	2
							K.WSTDDVQINDISLQDYIAVK.E	775.024	3
							K.WSTDDVQINDISLQDYIAVK.E	1162.53	2
							K.HAFEIIHLLTGENPLQVLVNAIINSGPR.E	1022.86	3
Q02543	Homo sapiens	60S ribosomal protein L18a	17/176 residues	0.0966	212	20749	K.VEEIAASK.C	423.719	2
							R.FWYFVSQLK.K	609.299	2
P61313	Homo sapiens	60S ribosomal protein L15	49/204 residues	0.2402	199	24131	R.NTLQLHR.Y	441.237	2
							K.QGYVIYR.I	449.727	2
							R.SLQSVAEER.A	509.744	2
							R.VLNSYWVGEDSTYK.F	830.865	2
							K.FFEVILIDPFHK.A	502.595	3
							K.FFEVILIDPFHK.A	752.886	2
Q07020	Homo sapiens	60S ribosomal protein L18	37/188 residues	0.1968	155	21621	R.TNSTFNQVVLK.R	625.817	2
							K.TAVVVGTITDDVR.V	449.233	3
							K.TAVVVGTITDDVR.V	673.346	2
							K.ILTFDQLALDSPK.G	730.877	2
P18621	Homo sapiens	60S ribosomal protein L17	49/184 residues	0.2663	147	21383	K.NAESNAELK.G	488.225	2
							K.EQIVPKPEEEVAQK.K	542.271	3
							R.YSLDPENPTK.S	582.261	2
							K.GLDVDSLVIEHIQVNK.A	593.973	3
							K.GLDVDSLVIEHIQVNK.A	890.453	2
P40429	Homo sapiens	60S ribosomal protein L13a	26/203 residues	0.1281	121	23562	R.MNTNPSR.G	410.181	2
							R.LAHEVGWK.Y	470.24	2
							K.YQAVTATLEEK.R	626.801	2
P61026	Homo sapiens	Ras-related protein Rab-10	22/200 residues	0.11	89	22527	K.LQIWDTAGQER.F	658.809	2
							K.AFLTLAEDILR.K	631.34	2
Q9HCN8	Homo sapiens	Stromal cell-derived factor 2-like protein 1	74/221 Residues	0.3348	85	23584	R.LTHVLTGK.N	434.752	2
							K.AMEGIFIKPSVEPSAGHDEL.-	709.994	3
							R.FQHVGTSVFLSVTGEQYGSPIR.G	804.049	3
							K.YGSGSGQQSVTGVEASDDANSYWR.I	841.337	3
Q99470	Homo sapiens	Stromal cell-derived factor 2	24/211 residues	0.1137	75	23011	R.YGSGSGQQSVTGVTSVDDSNSYWR.I	846.681	3
P27635	Homo sapiens	60S ribosomal protein L10	24/214 residues	0.1121	72	24588	R.VHIGQVIMSIR.T	418.23	3
							K.FNADEFEDMVAEK.R	515.873	3
							K.FNADEFEDMVAEK.R	772.803	2
P47985	Homo sapiens	Cytochrome b-c1 complex subunit Rieske, mitochondrial	15/274 residues	0.0547	69	29649	R.LEVLDSTK.S	452.736	2
							K.VPDFSEYR.R	506.722	2
P06748	Homo sapiens	Nucleophosmin	19/294 residues	0.0646	67	32555	K.DELHIVEAEAMNYEGSPIK.V	715.984	3
P00403	Homo sapiens	Cytochrome c oxidase subunit 2	53/227 residues	0.2335	63	25548	R.LLDVDNR.V	422.713	2
							R.VVLPIEAPIR.M	553.83	2
							R.ILYMTDEVNDPSLTIK.S	926.439	2
							R.MMITSQDVLHSWAVPTLGLK.T	743.366	3
O95816	Homo sapiens	BAG family molecular chaperone regulator 2	20/211 residues	0.0948	62	23757	K.TLQQNAESR.F	523.748	2
							R.LLESLDQLELR.V	664.851	2
O96000	Homo sapiens	NADH dehydrogenase [ubiquinone] 1 beta subcomplex subunit 10	24/172 residues	0.1395	55	20763	K.EVEQFTQVAK.A	589.784	2
							K.AFDLIVDRPVTLVR.E	538.632	3
P46778	Homo sapiens	60S ribosomal protein L21	26/160 residues	0.1625	54	18553	R.VYNVTQHAVGIVVNK.Q	547.622	3
							K.HGVVPLATYMR.I	415.211	3
P84098	Homo sapiens	60S ribosomal protein L19	9/196 residues	0.0459	50	23451	K.LLADQAEAR.R	493.749	2
P84103	Homo sapiens	Serine/arginine-rich splicing factor 3	8/164 residues	0.0488	46	19318	R.VELSNGEK.R	438.213	2
P68104	Homo sapiens	Elongation factor 1-alpha 1	12/462 residues	0.026	46	50109	K.YYVTIIDAPGHR.D	469.231	3
Q9UBQ5	Homo sapiens	Eukaryotic translation initiation factor 3 subunit K	32/218 residues	0.1468	42	25043	R.YVETQAK.E	419.705	2
							R.YNPENLATLER.Y	660.309	2
							K.ENAYDLEANLAVLK.L	782.378	2
P19404	Homo sapiens	NADH dehydrogenase [ubiquinone] flavoprotein 2, mitochondrial	10/249 residues	0.0402	42	27374	K.DIEEIIDELK.A	608.797	2

## Sheet: HCT116_4
ID	Entity	Name	Sequence coverage		Score	Mass	Peptide	Observed	Charge (+)
P61247	Homo sapiens	40S ribosomal protein S3a	93/264 residues	0.3523	483	29926	K.TSYAQHQQVR.Q	406.526	3
							K.ATGDETGAK.V	425.186	2
							K.LMELHGEGSSSGK.A	444.532	3
							R.EVQTNDLK.E	473.73	2
							K.LITEDVQGK.N	501.76	2
							K.TSYAQHQQVR.Q	609.284	2
							K.MMEIMTR.E	456.195	2
							K.TTDGYLLR.L	469.736	2
							K.WQTMIEAHVDVK.T	486.564	3
							R.VFEVSLADLQNDEVAFR.K	651.642	3
							R.VFEVSLADLQNDEVAFR.K	976.956	2
P62701	Homo sapiens	40S ribosomal protein S4, X isoform	89/263 residues	0.3384	473	29579	K.GIPHLVTHDAR.T	405.878	3
							R.HPGSFDVVHVK.D	407.87	3
							R.LTIAEER.D	416.218	2
							K.YALTGDEVK.K	498.239	2
							R.ERHPGSFDVVHVK.D	502.915	3
							K.DANGNSFATR.L	526.724	2
							K.VNDTIQIDLETGK.I	482.569	3
							K.VNDTIQIDLETGK.I	723.853	2
							R.LSNIFVIGK.G	495.786	2
							R.TDITYPAGFMDVISIDK.T	629.627	3
							R.TDITYPAGFMDVISIDK.T	943.93	2
Q96CN7	Homo sapiens	Isochorismatase domain-containing protein 1	115/298 residues	0.3859	460	32216	K.ASAPESGLLSK.V	530.27	2
							R.GVEVHIVADATSSR.S	480.904	3
							K.FLSLYGDQIDMHR.K	532.244	3
							K.YFGDIISVGQR.L	627.806	2
							K.GLGSTVQEIDLTGVK.L	758.656	2
							R.ILGIPVIVTEQYPK.G	523.961	3
							R.ILGIPVIVTEQYPK.G	785.436	2
							K.FSMVLPEVEAALAEIPGVR.S	677.01	3
							K.FVVQLFAEEWGQYVDLPK.G	723.678	3
							K.FSMVLPEVEAALAEIPGVR.S	1015.01	2
P15880	Homo sapiens	40S ribosomal protein S2	88/293 residues	0.3003	433	31305	K.ATFDAISK.T	426.712	2
							R.TQAPAVATT.-	430.216	2
							R.GTGIVSAPVPK.K	513.286	2
							R.TQAPAVATT.-	859.423	1
							K.AFVAIGDYNGHVGLGVK.C	572.953	3
							K.TYSYLTPDLWK.E	693.827	2
							K.SLEEIYLFSLPIK.E	518.275	3
							K.ESEIIDFFLGASLK.D	523.926	3
							K.ESEIIDFFLGASLKDEVLK.I	718.691	3
							K.SLEEIYLFSLPIK.E	776.408	2
							K.ESEIIDFFLGASLK.D	784.883	2
P21796	Homo sapiens	Voltage-dependent anion-selective channel protein 1	133/283 residues	0.47	359	30754	K.VTGSLETK.Y	417.718	2
							K.SENGLEFTSSGSANTETTK.V	980.91	2
							R.VTQSNFAVGYK.T	607.293	2
							K.KLETAVNLAWTAGNSNTR.F	649.654	3
							R.WTEYGLTFTEK.W	687.809	2
							K.LTFDSSFSPNTGK.K	700.815	2
							K.VNNSSLIGLGYTQTLKPGIK.L	702.042	3
							K.TDEFQLHTNVNDGTEFGGSIYQK.V	867.704	3
							K.LTLSALLDGK.N	515.793	2
P62424	Homo sapiens	60S ribosomal protein L7a	69/266 residues	0.2594	316	29977	K.VAPAPAVVK.K	426.257	2
							R.HWGGNVLGPK.S	532.766	2
							K.NFGIGQDIQPK.R	406.202	3
							R.AGVNTVTTLVENK.K	449.234	3
							R.AGVNTVTTLVENKK.A	491.931	3
							K.KVVNPLFEK.R	537.304	2
							K.NFGIGQDIQPK.R	609.301	2
							R.AGVNTVTTLVENK.K	673.347	2
							K.VPPAINQFTQALDR.Q	523.933	3
							R.LKVPPAINQFTQALDR.Q	604.657	3
							K.VPPAINQFTQALDR.Q	785.395	2
P00761	Sus scrofa	Trypsin	58/231 residues	0.2511	296	24394	K.LSSPATLNSR.V	523.268	2
							R.VATVSLPR.S	421.745	2
							R.LGEHNIDVLEGNEQFINAAK.I	738.014	3
							R.LGEHNIDVLEGNEQFINAAK.I	1106.52	2
							K.IITHPNFNGNTLDNDIMLIK.L	762.039	3
P23396	Homo sapiens	40S ribosomal protein S3	120/243 residues	0.4939	295	26671	R.FIMESGAK.G	441.708	2
							R.TQNVLGEK.G	444.236	2
							R.ELTAVVQK.R	444.249	2
							K.KPLPDHVSIVEPK.D	486.933	3
							K.LLGGLAVR.R	399.75	2
							K.DEILPTTPISEQK.G	490.911	3
							K.GGKPEPPAMPQPVPTA.-	525.256	3
							K.AELNEFLTR.E	546.769	2
							R.ELAEDGYSGVEVR.V	712.314	2
							R.FGFPEGSVELYAEK.V	524.906	3
							K.IMLPWDPTGK.I	579.285	2
							R.FGFPEGSVELYAEK.V	786.855	2
P62753	Homo sapiens	40S ribosomal protein S6	53/249 residues	0.2129	289	28663	K.QGVLTHGR.V	434.229	2
							K.EEAAEYAK.L	455.696	2
							K.LIEVDDER.K	494.734	2
							K.NKEEAAEYAK.L	576.76	2
							R.MATEVAADALGEEWK.G	540.906	3
							K.DIPGLTDTTVPR.R	642.822	2
							R.MATEVAADALGEEWK.G	810.854	2
P63244	Homo sapiens	Receptor of activated protein C kinase 1	88/317 residues	0.2776	287	35055	K.QEVISTSSK.A	489.743	2
							R.DETNYGIPQR.A	596.764	2
							K.DVLSVAFSSDNR.Q	437.203	3
							R.VWQVTIGTR.-	530.284	2
							R.LWDLTTGTTTR.R	632.809	2
							K.DVLSVAFSSDNR.Q	655.3	2
							K.DGQAMLWDLNEGK.H	738.817	2
							K.GHNGWVTQIATTPQFPDMILSASR.D	876.741	3
P18124	Homo sapiens	60S ribosomal protein L7	75/248 residues	0.3024	221	29207	K.TTHFVEGGDAGNR.E	454.198	3
							K.ASINMLR.I	402.711	2
							R.QIFNGTFVK.L	527.273	2
							R.IALTDNALIAR.S	585.826	2
							K.AGNFYVPAEPK.L	596.783	2
							K.EANNFLWPFK.L	633.296	2
							R.IVEPYIAWGYPNLK.S	831.917	2
P26373	Homo sapiens	60S ribosomal protein L13	67/211 residues	0.3175	213	24247	R.VITEEEK.N	424.209	2
							K.EAAEQDVEK.K	509.721	2
							K.KGDSSAEELK.L	532.249	2
							K.STESLQANVQR.L	616.794	2
							K.LATQLTGPVMPVR.N	461.583	3
							R.GFSLEELR.V	475.735	2
							R.TIGISVDPR.R	479.256	2
							K.LATQLTGPVMPVR.N	691.872	2
Q16698	Homo sapiens	2,4-dienoyl-CoA reductase, mitochondrial	81/335 residues	0.2418	203	36045	R.LDPTGTFEK.E	504.238	2
							K.ATAEQISSQTGNK.V	667.808	2
							K.VAGHPNIVINNAAGNFISPTER.L	764.709	3
							K.EQWDTIEELIR.K	716.334	2
							K.GAAFLSITTIYAETGSGFVVPSASAK.A	849.413	3
O75489	Homo sapiens	NADH dehydrogenase [ubiquinone] iron-sulfur protein 3, mitochondrial	39/264 residues	0.1477	200	30223	R.ILTDYGFEGHPFR.K	517.907	3
							K.SLVDLTAVDVPTR.Q	693.361	2
							R.VVAEPVELAQEFR.K	743.871	2
Q00688	Homo sapiens	Peptidyl-prolyl cis-trans isomerase FKBP3	62/224 residues	0.2768	198	25161	K.SEETLDEGPPK.Y	601.261	2
							K.DHLVTAYNHLFETK.R	563.266	3
							K.FLQEHGSDSFLAEHK.L	582.597	3
							R.LEIEPEWAYGK.K	667.812	2
							R.GWDEALLTMSK.G	625.786	2
P62241	Homo sapiens	40S ribosomal protein S8	68/208 residues	0.3269	179	24190	R.ADGYVLEGK.E	476.227	2
							K.LTPEEEEILNK.K	438.883	3
							K.ELEFYLR.K	485.24	2
							K.ISSLLEEQFQQGK.L	502.914	3
							R.QWYESHYALPLGR.K	540.92	3
							R.IIDVVYNASNNELVR.T	573.622	3
							K.LTPEEEEILNK.K	657.821	2
							K.ISSLLEEQFQQGK.L	753.867	2
							R.IIDVVYNASNNELVR.T	859.925	2
P50914	Homo sapiens	60S ribosomal protein L14	24/215 residues	0.1116	163	23417	R.VAYVSFGPHAGK.L	616.804	2
							R.VAYVSFGPHAGK.L	411.54	3
							K.LVAIVDVIDQNR.A	452.245	3
							K.LVAIVDVIDQNR.A	677.865	2
P45880	Homo sapiens	Voltage-dependent anion-selective channel protein 2	74/294 residues	0.2517	159	31547	K.VTGTLETK.Y	424.726	2
							R.NNFAVGYR.T	470.72	2
							K.YQLDPTASISAK.V	647.316	2
							K.LTFDTTFSPNTGK.K	714.829	2
							R.TGDFQLHTNVNDGTEFGGSIYQK.V	843.698	3
							K.LTLSALVDGK.S	508.785	2
Q15717	Homo sapiens	ELAV-like protein 1	45/326 residues	0.138	154	36069	R.VLVDQTTGLSR.G	594.812	2
							K.ILQVSFK.T	417.744	2
							K.NVALLSQLYHSPAR.R	523.605	3
							R.SLFSSIGEVESAK.L	677.325	2
P06748	Homo sapiens	Nucleophosmin	62/294 residues	0.2109	152	32555	R.TVSLGAGAK.D	402.221	2
							K.VDNDENEHQLSLR.T	523.563	3
							K.DELHIVEAEAMNYEGSPIK.V	715.987	3
							K.MSVQPTVSLGGFEITPPVVLR.L	743.383	3
							K.MSVQPTVSLGGFEITPPVVLR.L	1114.57	2
P62906	Homo sapiens	60S ribosomal protein L10a	62/217 residues	0.2857	146	24816	R.ILGPGLNK.A	406.242	2
							R.DTLYEAVR.E	483.731	2
							K.YDAFLASESLIK.Q	678.833	2
							K.FLETVELQISLK.N	710.386	2
							K.MTDDELVYNIHLAVNFLVSLLK.K	850.092	3
P62917	Homo sapiens	60S ribosomal protein L8	34/257 residues	0.1323	140	28007	R.AVDFAER.H	404.19	2
							R.AVVGVVAGGGR.I	471.264	2
							R.ASGNYATVISHNPETK.K	563.594	3
							R.ASGNYATVISHNPETK.K	844.886	2
Q96HS1	Homo sapiens	Serine/threonine-protein phosphatase PGAM5, mitochondrial	26/289 residues	0.09	120	31985	R.EQAELTGLR.L	508.754	2
							K.VSTDLLR.E	402.221	2
							R.AIETTDIISR.H	559.788	2
Q9P0L0	Homo sapiens	Vesicle-associated membrane protein-associated protein A	42/249 residues	0.1687	115	27875	K.VAHSDKPGSTSTASFR.D	549.923	3
							K.HEQILVLDPPTDLK.F	539.949	3
							K.GPFTDVVTTNLK.L	646.326	2
P41227	Homo sapiens	N-alpha-acetyltransferase 10	51/235 residues	0.217	112	26442	K.GLAAEDSGGDSK.D	553.733	2
							R.AMIENFNAK.Y	519.241	2
							R.DLTQMADELR.R	596.267	2
							R.AALHLYSNTLNFQISEVEPK.Y	759.038	3
P09651	Homo sapiens	Heterogeneous nuclear ribonucleoprotein A1	41/372 residues	0.1102	102	38723	R.GFAFVTFDDHDSVDK.I	567.239	3
							K.IEVIEIMTDR.G	609.802	2
							K.LFIGGLSFETTDESLR.S	892.924	2
P32322	Homo sapiens	Pyrroline-5-carboxylate reductase 1, mitochondrial	45/319 residues	0.1411	100	33340	K.LDSPAGTALSPSGHTK.L	513.581	3
							R.EGATVYATGTHAQVEDGR.L	621.272	3
							R.LGAQALLGAAK.M	506.794	2
P32969	Homo sapiens	60S ribosomal protein L9	27/192 residues	0.1406	95	21850	K.DELILEGNDIELVSNSAALIQQATTVK.N	962.472	3
Q01130	Homo sapiens	Serine/arginine-rich splicing factor 2	15/221 residues	0.0679	93	25461	K.VDNLTYR.T	440.716	2
							R.VGDVYIPR.D	459.741	2
Q07955	Homo sapiens	Serine/arginine-rich splicing factor 1	27/248 residues	0.1089	93	27728	R.DAEDAVYGR.D	498.209	2
							K.DIEDVFYK.Y	514.733	2
							R.DGTGVVEFVR.K	539.761	2
P35232	Homo sapiens	Prohibitin	88/272 residues	0.3235	87	29786	K.AAIISAEGDSK.A	531.258	2
							R.FDAGELITQR.E	575.279	2
							R.IFTSIGEDYDER.V	722.809	2
							R.VLPSITTEILK.S	607.353	2
							K.FGLALAVAGGVVNSALYNVDAGHR.A	791.391	3
							R.AATFGLILDDVSLTHLTFGK.E	707.027	3
P24534	Homo sapiens	Elongation factor 1-beta	35/225 residues	0.1556	86	24748	R.LAQYESK.K	419.704	2
							R.SIQADGLVWGSSK.L	674.325	2
							K.SPAGLQVLNDYLADK.S	802.391	2
P16403	Homo sapiens	Histone H1.2	41/213 residues	0.1925	86	21352	K.GTGASGSFK.L	406.188	2
							K.ALAAAGYDVEK.N	554.268	2
							R.SGVSLAALK.K	423.24	2
							K.ASGPPVSELITK.A	599.817	2
P68104	Homo sapiens	Elongation factor 1-alpha 1	23/462 residues	0.0498	78	50109	K.YYVTIIDAPGHR.D	468.898	3
							K.IGGIGTVPVGR.V	513.292	2
Q07021	Homo sapiens	Complement component 1 Q subcomponent-binding protein, mitochondrial	41/282 residues	0.1454	77	31343	K.AFVDFLSDEIK.E	642.308	2
							K.VEEQEPELTSTPNFVVEVIK.N	763.032	3
P12236	Homo sapiens	ADP/ATP translocase 3	45/298 residues	0.151	71	32845	R.AAYFGVYDTAK.G	603.274	2
							K.EQGVLSFWR.G	561.271	2
							K.DFLAGGIAAAISK.T	617.324	2
							R.YFPTQALNFAFK.D	723.848	2
Q9Y224	Homo sapiens	RNA transcription, translation and transport factor protein	24/244 residues	0.0984	68	28051	R.LTQDAVAK.A	423.222	2
							K.INEAIVAVQAIIADPK.T	832.952	2
P84098	Homo sapiens	60S ribosomal protein L19	26/196 residues	0.1327	65	23451	K.LLADQAEAR.R	493.75	2
							K.VWLDPNETNEIANANSR.Q	648.624	3
							K.VWLDPNETNEIANANSR.Q	971.931	2
P04792	Homo sapiens	Heat shock protein beta-1	10/205 residues	0.0488	64	22768	R.LFDQAFGLPR.L	582.293	2
Q86V81	Homo sapiens	THO complex subunit 4	37/257 residues	0.144	63	26872	R.SLGTADVHFER.R	411.193	3
							K.LLVSNLDFGVSDADIQELFAEFGTLK.K	948.12	3
P06730	Homo sapiens	Eukaryotic translation initiation factor 4E	14/217 residues	0.0645	61	25082	K.IVIGYQSHADTATK.S	502.25	3
P09496	Homo sapiens	Clathrin light chain A	9/248 residues	0.0363	58	27060	R.LEALDANSR.K	494.74	2
Q9HAN9	Homo sapiens	Nicotinamide/nicotinic acid mononucleotide adenylyltransferase 1	48/279 residues	0.172	58	31913	R.VIMAELATK.N	488.263	2
							R.NAGVILAPLQR.N	576.283	2
							R.SNIHVVNEWIANDISSTK.I	676.657	3
							K.FIYESDVLWK.H	650.314	2
P81605	Homo sapiens	Dermcidin	22/110 residues	0.2	57	11277	K.ENAGEDPGLAR.Q	564.748	2
							K.DAVEDLESVGK.G	581.262	2
Q15019	Homo sapiens	Septin-2	18/361 residues	0.0499	52	41461	R.ILDEIEEHNIK.I	451.559	3
							K.VNIVPVIAK.A	476.797	2
P26583	Homo sapiens	High mobility group protein B2	13/209 residues	0.0622	49	24019	K.SEHPGLSIGDTAK.K	437.874	3
P31946	Homo sapiens	14-3-3 protein beta/alpha	10/246 residues	0.0407	46	28065	K.DSTLIMQLLR.D	595.313	2
B2RXH8	Homo sapiens	Heterogeneous nuclear ribonucleoprotein C-like 1	8/293 residues	0.0273	41	32053	R.ISGNTSRR.G	445.725	2
P08574	Homo sapiens	Cytochrome c1, heme protein, mitochondrial	11/325 residues	0.0338	41	35399	R.GLLSSLDHTSIR.R	433.559	3

## Sheet: HCT116_5
ID	Entity	Name	Sequence coverage		Score	Mass	Peptide	Observed	Charge (+)
Q02878	Homo sapiens	60S ribosomal protein L6	112/288 residues	0.3889	769	32708	K.VEKPDTK.E	408.298	2
							K.VLATVTKPVGGDK.N	428.908	3
							K.FVIATSTK.I	433.739	2
							R.HQEGEIFDTEK.E	444.859	3
							K.YEITEQR.K	469.717	2
							R.HQEGEIFDTEKEK.Y	530.903	3
							R.YYPTEDVPR.K	570.253	2
							K.VLATVTKPVGGDK.N	642.857	2
							R.HQEGEIFDTEK.E	666.785	2
							R.SVFALTNGIYPHK.L	482.911	3
							K.AIPQLQGYLR.S	579.813	2
							K.QLASGLLLVTGPLVLNR.V	588.674	3
							K.QLASGLLLVTGPLVLNR.V	883.008	2
							R.ASITPGTILIILTGR.H	509.297	3
							R.ASITPGTILIILTGR.H	763.442	2
P07355	Homo sapiens	Annexin A2	137/339 residues	0.4041	683	38580	R.TNQELQEINR.V	415.533	3
							K.AYTNFDAER.D	543.307	2
							K.TPAQYDASELK.A	611.78	2
							R.TNQELQEINR.V	622.793	2
							K.DIISDTSGDFRK.L	451.877	3
							K.SLYYYIQQDTK.G	474.552	3
							R.DALNIETAIK.T	544.283	2
							R.QDIAFAYQR.R	556.26	2
							K.TDLEKDIISDTSGDFR.K	604.603	3
							K.DIISDTSGDFR.K	613.267	2
							R.AEDGSVIDYELIDQDAR.D	636.942	3
							R.RAEDGSVIDYELIDQDAR.D	689.307	3
							R.AEDGSVIDYELIDQDAR.D	954.906	2
							K.SYSPYDMLESIR.K	487.544	3
							K.SALSGHLETVILGLLK.T	550.978	3
							K.SYSPYDMLESIR.K	730.813	2
							K.GVDEVTIVNILTNR.S	771.897	2
							K.SALSGHLETVILGLLK.T	825.963	2
P00761	Sus scrofa	Trypsin	76/231 residues	0.329	509	24394	R.VATVSLPR.S	421.744	2
							K.LSSPATLNSR.V	523.268	2
							R.LGEHNIDVLEGNEQFINAAK.I	738.011	3
							K.IITHPNFNGNTLDNDIMLIK.L	762.036	3
							R.SCAAAGTECLISGWGNTK.S	884.363	2
							R.LGEHNIDVLEGNEQFINAAK.I	1106.51	2
Q13765	Homo sapiens	Nascent polypeptide-associated complex subunit alpha	70/215 residues	0.3256	347	23370	K.DIELVMSQANVSR.A	487.898	3
							K.SPASDTYIVFGEAK.I	495.562	3
							K.NILFVITKPDVYK.S	517.284	3
							K.IEDLSQQAQLAAAEK.F	538.929	3
							K.DIELVMSQANVSR.A	731.344	2
							K.SPASDTYIVFGEAK.I	742.838	2
							K.NILFVITKPDVYK.S	775.423	2
							K.IEDLSQQAQLAAAEK.F	807.891	2
							K.NNSNDIVNAIMELTM.-	839.862	2
P05388	Homo sapiens	60S acidic ribosomal protein P0	110/317 residues	0.347	334	34252	R.GHLENNPALEK.L	407.865	3
							K.EDLTEIR.D	438.213	2
							R.GHLENNPALEK.L	611.293	2
							R.GNVGFVFTK.E	484.746	2
							K.IIQLLDDYPK.C	609.318	2
							R.GTIEILSDVQLIK.T	476.93	3
							R.VLALSVETDYTFPLAEK.V	632.648	3
							K.TSFFQALGITTK.I	657.334	2
							R.GTIEILSDVQLIK.T	714.891	2
							K.AFLADPSAFVAAAPVAAATTAAPAAAAAPAK.V	918.458	3
							R.VLALSVETDYTFPLAEK.V	948.968	2
P06748	Homo sapiens	Nucleophosmin	85/294 residues	0.2891	310	32555	R.TVSLGAGAK.D	402.222	2
							K.GPSSVEDIK.A	466.225	2
							K.VDNDENEHQLSLR.T	523.564	3
							K.DELHIVEAEAMNYEGSPIK.V	715.985	3
							R.MTDQEAIQDLWQWR.K	607.597	3
							K.MSVQPTVSLGGFEITPPVVLR.L	743.384	3
							R.MTDQEAIQDLWQWR.K	910.39	2
							K.MSVQPTVSLGGFEITPPVVLR.L	1114.57	2
P05198	Homo sapiens	Eukaryotic translation initiation factor 2 subunit 1	84/315 residues	0.2667	286	36089	R.YVMTTTTLER.T	607.787	2
							K.VVTDTDETELAR.Q	674.81	2
							K.TVYSILR.H	426.238	2
							K.INLIAPPR.Y	447.267	2
							R.TAWVFDDK.Y	491.22	2
							R.GVFNVQMEPK.V	574.77	2
							K.DEQLESLFQR.T	632.788	2
							K.HAVSDPSILDSLDLNEDER.E	709.313	3
P46777	Homo sapiens	60S ribosomal protein L5	75/297 residues	0.2525	283	34341	R.ENPVYEK.K	439.702	2
							K.GAVDGGLSIPHSTK.R	446.891	3
							K.EFNAEVHR.K	501.226	2
							R.YLMEEDEDAYKK.Q	511.881	3
							R.FPGYDSESK.E	515.212	2
							K.GAVDGGLSIPHSTK.R	669.833	2
							K.HIMGQNVADYMR.Y	478.876	3
							K.NSVTPDMMEEMYK.K	787.799	2
Q13347	Homo sapiens	Eukaryotic translation initiation factor 3 subunit I	59/325 residues	0.1815	272	36479	K.SGEVLVNVK.E	472.758	2
							K.SYSSGGEDGYVR.I	638.753	2
							R.EGDLLFTVAK.D	546.78	2
							K.GHFGPINSVAFHPDGK.S	560.929	3
							R.FFHLAFEEEFGR.V	510.226	3
P22626	Homo sapiens	Heterogeneous nuclear ribonucleoproteins A2/B1	92/353 residues	0.2606	196	37407	R.GGSDGYGSGR.G	456.679	2
							K.YHTINGHNAEVR.K	471.221	3
							R.GGNFGFGDSR.G	507.209	2
							R.QEMQEVQSSR.S	610.744	2
							R.GGGGNFGPGPGSNFR.G	689.295	2
							K.TLETVPLER.K	529.278	2
							K.IDTIEIITDR.Q	594.804	2
							K.LFIGGLSFETTEESLR.N	600.288	3
							K.LFIGGLSFETTEESLR.N	899.93	2
P09651	Homo sapiens	Heterogeneous nuclear ribonucleoprotein A1	70/372 residues	0.1882	189	38723	K.SESPKEPEQLR.K	433.876	3
							R.NQGGYGGSSSSSSYGSGR.R	847.823	2
							R.GFAFVTFDDHDSVDK.I	567.236	3
							K.IEVIEIMTDR.G	609.799	2
							R.GFAFVTFDDHDSVDK.I	850.35	2
							K.LFIGGLSFETTDESLR.S	595.619	3
							K.LFIGGLSFETTDESLR.S	892.921	2
Q99623	Homo sapiens	Prohibitin-2	77/299 residues	0.2575	163	33276	K.IVQAEGEAEAAK.M	608.294	2
							R.AQVSLLIR.R	450.271	2
							K.FNASQLITQR.A	589.297	2
							R.IGGVQQDTILAEGLHFR.I	618.643	3
							R.VLPSIVNEVLK.S	605.851	2
							R.IYLTADNLVLNLQDESFTR.G	742.693	3
P68104	Homo sapiens	Elongation factor 1-alpha 1	69/462 residues	0.1494	160	50109	K.EVSTYIK.K	420.217	2
							K.YYVTIIDAPGHR.D	468.898	3
							K.IGGIGTVPVGR.V	513.291	2
							K.THINIVVIGHVDSGK.S	530.614	3
							R.VETGVLKPGMVVTFAPVNVTTEVK.S	839.433	3
Q99988	Homo sapiens	Growth/differentiation factor 15	61/308 residues	0.1981	152	34119	R.ILTPEVR.L	414.241	2
							R.ASFPGPSELHSEDSR.F	539.231	3
							R.YEDLLTR.L	455.223	2
							K.TDTGVSLQTYDDLLAK.D	870.404	2
							R.ASLEDLGWADWVLSPR.E	605.954	3
							R.ASLEDLGWADWVLSPR.E	907.924	2
Q16181	Homo sapiens	Septin-7	79/437 residues	0.1808	144	50648	K.TVQVEQSK.V	459.733	2
							K.DVTNNVHYENYR.S	508.551	3
							K.VNIIPLIAK.A	490.81	2
							K.FEDYLNAESR.V	622.26	2
							K.NLEGYVGFANLPNQVYR.K	651.974	3
							K.STLINSLFLTDLYSPEYPGPSHR.I	870.077	3
P62873	Homo sapiens	Guanine nucleotide-binding protein G(I)/G(S)/G(T) subunit beta-1	21/340 residues	0.0618	135	37353	R.LLVSASQDGK.L	509.265	2
							K.LIIWDSYTTNK.V	677.33	2
Q96AG4	Homo sapiens	Leucine-rich repeat-containing protein 59	68/307 residues	0.2215	134	34909	K.AVQADQER.E	458.713	2
							R.LVNLQHLDLLNNK.L	511.943	3
							K.DNPLDPVLAK.V	541.278	2
							K.LQQLPADFGR.L	572.789	2
							R.RHEILQWVLQTDSQQ.-	627.969	3
							K.LVTLPVSFAQLK.N	658.378	2
P29692	Homo sapiens	Elongation factor 1-delta	70/281 residues	0.1837	105	31103	K.SLAGSSGPGASSGTSGDHGELVVR.I	728.997	3
							K.LVPVGYGIR.K	487.276	2
							R.IASLEVENQSLR.G	679.844	2
							R.GVVQELQQAISK.L	650.342	2
							R.SIQLDGLVWGASK.L	687.35	2
Q16795	Homo sapiens	NADH dehydrogenase [ubiquinone] 1 alpha subcomplex subunit 9, mitochondrial	61/377 residues	0.1618	104	42483	K.SFAFVGPSR.Y	484.236	2
							K.LPHLPGLEDLGIQATPLELK.A	719.052	3
							R.VFEISPFEPWITR.D	811.396	2
							R.SSVSGIVATVFGATGFLGR.Y	609.31	3
P15880	Homo sapiens	40S ribosomal protein S2	14/293 residues	0.0478	101	31305	K.ESEIIDFFLGASLK.D	785.386	2
P61247	Homo sapiens	40S ribosomal protein S3a	17/264 residues	0.0644	69	29926	R.VFEVSLADLQNDEVAFR.K	651.306	3
							R.VFEVSLADLQNDEVAFR.K	976.455	2
Q08170	Homo sapiens	Serine/arginine-rich splicing factor 4	9/494 residues	0.0182	56	56645	R.LIVENLSSR.C	515.779	2
O14979	Homo sapiens	Heterogeneous nuclear ribonucleoprotein D-like	24/420 residues	0.0571	53	46409	K.VFVGGLSPDTSEEQIK.E	853.904	2
							R.GFGFVLFK.D	457.743	2
Q15366	Homo sapiens	Poly(rC)-binding protein 2	22/365 residues	0.0603	50	38556	K.IANPVEGSTDR.Q	579.771	2
							R.QVTITGSAASISLAQYLINVR.L	735.72	3
P04406	Homo sapiens	Glyceraldehyde-3-phosphate dehydrogenase	50/335 residues	0.1493	50	36030	R.GALQNIIPASTGAAK.A	706.374	2
							R.VIISAPSADAPMFVMGVNHEK.Y	738.679	3
							K.LISWYDNEFGYSNR.V	882.369	2
Q8NGZ3	Homo sapiens	Olfactory receptor 13G1	7/307 residues	0.0228	45	34649	R.EMQAGIR.K	402.2	2
Q5VT25	Homo sapiens	Serine/threonine-protein kinase MRCK alpha	7/1732 residues	0.004	45	197182	K.EEIEKLR.K	458.725	2
Q7Z7K6	Homo sapiens	Centromere protein V	13/275 residues	0.0473	44	29927	K.LLLDTFEYQGLVK.H	769.898	2
P50402	Homo sapiens	Emerin	33/254 residues	0.1299	44	28976	R.YNIPHGPVVGSTR.R	466.568	3
							R.APGAGLGQDR.Q	471.228	2
							R.GDADMYDLPK.K	562.731	2
P43307	Homo sapiens	Translocon-associated protein subunit alpha	23/286 residues	0.0804	41	32215	K.FLVGFTNK.G	463.245	2
							K.GTEDFIVESLDASFR.Y	843.371	2
P51659	Homo sapiens	Peroxisomal multifunctional enzyme type 2	13/736 residues	0.0177	41	79636	R.VVLVTGAGAGLGR.A	585.333	2
Q13151	Homo sapiens	Heterogeneous nuclear ribonucleoprotein A0	36/305 residues	0.118	41	30822	K.LFIGGLNVQTSESGLR.G	845.927	2
							K.GDVAEGDLIEHFSQFGTVEK.A	726.99	3

## Sheet: HCT116_6
ID	Entity	Name	Sequence coverage		Score	Mass	Peptide	Observed	Charge (+)
Q9NVA2	Homo sapiens	Septin-11	148/429 residues	0.345	835	48961	K.FESDPATHNEPGVR.L	519.223	3
							K.FESDPATHNEPGVR.L	778.331	2
							R.VNMEDLR.E	438.699	2
							K.SLDLVTMK.K	453.736	2
							R.SLFNYHDTR.I	576.754	2
							K.AAAQLLQSQAQQSGAQQTK.K	653.318	3
							K.ELEEEVNNFQK.K	689.804	2
							K.KAAAQLLQSQAQQSGAQQTK.K	695.681	3
							K.AAAQLLQSQAQQSGAQQTK.K	979.47	2
							K.VNIIPIIAK.A	490.811	2
							K.LTIVDTVGFGDQINK.D	540.279	3
							K.STLMDTLFNTK.F	635.798	2
							R.NLSLSGHVGFDSLPDQLVNK.S	714.348	3
							K.LTIVDTVGFGDQINK.D	810.406	2
							K.DDSYKPIVEYIDAQFEAYLQEELK.I	969.771	3
Q8NC51	Homo sapiens	Plasminogen activator inhibitor 1 RNA-binding protein	93/408 residues	0.2279	455	44938	R.KPNEGADGQWK.K	410.52	3
							R.RPDQQLQGEGK.I	419.203	3
							K.SAAQAAAQTNSNAAGK.Q	487.558	3
							K.ENEVEEVKEEGPK.E	505.892	3
							K.EAGGGGVGGPGAK.S	507.236	2
							R.RPDQQLQGEGK.I	628.301	2
							K.SAAQAAAQTNSNAAGK.Q	730.831	2
							R.KNPLPPSVGVVDK.K	450.581	3
							R.FDQLFDDESDPFEVLK.A	648.612	3
P00761	Sus scrofa	Trypsin	58/231 residues	0.2511	374	24394	K.LSSPATLNSR.V	523.265	2
							R.VATVSLPR.S	421.743	2
							R.LGEHNIDVLEGNEQFINAAK.I	738.013	3
							K.IITHPNFNGNTLDNDIMLIK.L	762.038	3
							R.LGEHNIDVLEGNEQFINAAK.I	1106.51	2
P68104	Homo sapiens	Elongation factor 1-alpha 1	98/462 residues	0.2121	356	50109	K.EVSTYIK.K	420.213	2
							K.QLIVGVNK.M	435.757	2
							R.QTVAVGVIK.A	457.771	2
							K.YYVTIIDAPGHR.D	468.897	3
							K.IGGIGTVPVGR.V	513.289	2
							K.THINIVVIGHVDSGK.S	530.278	3
							K.YYVTIIDAPGHR.D	702.841	2
							R.EHALLAYTLGVK.Q	438.903	3
							R.EHALLAYTLGVK.Q	657.851	2
							R.VETGVLKPGMVVTFAPVNVTTEVK.S	839.434	3
P78371	Homo sapiens	T-complex protein 1 subunit beta	158/535 residues	0.2976	331	57452	R.EAESLIAK.K	430.723	2
							R.AAHSEGNTTAGLDMR.E	510.884	3
							R.EALLSSAVDHGSDEar	552.921	3
							K.LIEEVMIGEDK.L	638.307	2
							K.ILIANTGMDTDK.I	646.307	2
							R.GATQQILDEAER.S	665.809	2
							R.LTSFIGAIAIGDLVK.S	759.924	2
							R.VQDDEVGDGTTSVTVLAAELLR.E	763.364	3
							R.MLPTIIADNAGYDSADLVAQLR.A	783.375	3
							K.LGGSLADSYLDEGFLLDK.K	957.446	2
							R.VQDDEVGDGTTSVTVLAAELLR.E	1145.04	2
P08865	Homo sapiens	40S ribosomal protein SA	129/295 residues	0.4373	310	32833	R.LLVVTDPR.A	456.762	2
							R.DPEEIEKEEQAAAEK.A	572.582	3
							K.FAAATGATPIAGR.F	602.304	2
							R.FTPGTFTNQIQAAFR.E	567.271	3
							K.SDGIYIINLK.R	568.301	2
							R.AIVAIENPADVSVISSR.N	580.967	3
							R.FTPGTFTNQIQAAFR.E	850.403	2
							R.AIVAIENPADVSVISSR.N	870.946	2
							K.FLAAGTHLGGTNLDFQMEQYIYK.R	873.399	3
							K.GAHSVGLMWWMLAR.E	538.921	3
							R.EHPWEVMPDLYFYR.D	628.271	3
P26599	Homo sapiens	Polypyrimidine tract-binding protein 1	120/531 residues	0.226	288	57186	R.EGQEDQGLTK.D	552.742	2
							K.VTNLLMLK.G	466.269	2
							K.NNQFQALLQYADPVSAQHAK.L	748.351	3
							R.VTPQSLFILFGVYGDVQR.V	680.682	3
							R.KLPIDVTEGEVISLGLPFGK.V	705.047	3
							R.IAIPGLAGAGNSVLLVSNLNPER.V	759.405	3
							R.VTPQSLFILFGVYGDVQR.V	1020.52	2
							R.IAIPGLAGAGNSVLLVSNLNPER.V	1138.6	2
							R.IIVENLFYPVTLDVLHQIFSK.F	830.437	3
Q9UBS4	Homo sapiens	DnaJ homolog subfamily B member 11	114/358 residues	0.3184	268	40489	R.TTQLGPGR.F	415.215	2
							K.EQLTEEAR.E	488.221	2
							R.NPDDPQAQEK.F	571.239	2
							R.TLEVEIEPGVR.D	621.318	2
							K.FQDLGAAYEVLSDSEK.R	591.264	3
							R.DGMEYPFIGEGEPHVDGEPGDLR.F	839.674	3
							K.FQDLGAAYEVLSDSEK.R	886.389	2
							K.GSLIITFDVDFPK.E	726.367	2
							R.GSDIIVDLEVTLEEVYAGNFVEVVR.N	922.782	3
P00367	Homo sapiens	Glutamate dehydrogenase 1, mitochondrial	161/558 residues	0.2885	255	61359	R.GASIVEDK.L	409.702	2
							K.IIAEGANGPTTPEADK.I	792.367	2
							R.FTMELAK.K	420.205	2
							K.ALASLMTYK.C	499.255	2
							R.TAAYVNAIEK.V	540.27	2
							R.YSTDVSVDEVK.A	621.275	2
							K.YNLGLDLR.T	482.249	2
							K.DIVHSGLAYTMER.S	497.896	3
							K.HGGTIPIVPTAEFQDR.I	579.948	3
							K.TFVVQGFGNVGLHSMR.Y	583.614	3
							R.DSNYHLLMSVQESLER.K	641.288	3
							R.DDGSWEVIEGYR.A	713.294	2
							K.GFIGPGIDVPAPDMSTGER.E	958.429	2
P60842	Homo sapiens	Eukaryotic initiation factor 4A-I	157/406 residues	0.3867	253	46125	K.VDWLTEK.M	445.717	2
							R.VFDMLNR.R	447.713	2
							K.GVAINMVTEEDKR.T	487.9	3
							K.ATQALVLAPTR.E	570.819	2
							R.GIYAYGFEKPSAIQQR.A	609.962	3
							K.GYDVIAQAQSGTGK.T	697.823	2
							K.EELTLEGIR.Q	530.268	2
							K.LQMEAPHIIVGTPGR.V	540.609	3
							R.VLITTDLLAR.G	557.825	2
							R.GIDVQQVSLVINYDLPTNR.E	715.693	3
							K.MFVLDEADEMLSR.G	778.332	2
							K.LNSNTQVVLLSATMPSDVLEVTK.K	820.745	3
							R.GIDVQQVSLVINYDLPTNR.E	1073.03	2
P36578	Homo sapiens	60S ribosomal protein L4	71/427 residues	0.1663	234	47667	K.AAAAAAALQAK.S	478.762	2
							K.MINTDLSR.I	475.224	2
							R.KLDELYGTWR.K	640.813	2
							R.IEEVPELPLVVEDK.V	536.943	3
							K.LDELYGTWR.K	576.767	2
							K.APIRPDIVNFVHTNLR.K	621.663	3
							R.NIPGITLLNVSK.L	634.859	2
P12532	Homo sapiens	Creatine kinase U-type, mitochondrial	88/417 residues	0.211	228	47007	K.HTTDLDASK.I	494.224	2
							R.VVVDALSGLK.G	500.787	2
							K.SFLIWVNEEDHTR.V	549.585	3
							R.GWEFMWNER.L	627.75	2
							R.GTGGVDTAATGGVFDISNLDR.L	674.972	3
							R.GTGGVDTAATGGVFDISNLDR.L	1011.95	2
							K.TVGMVAGDEETYEVFADLFDPVIQER.H	977.761	3
Q12905	Homo sapiens	Interleukin enhancer-binding factor 2	94/390 residues	0.241	227	43035	K.VLQSALAAIR.H	521.306	2
							R.VKPAPDETSFSEALLK.R	577.955	3
							K.ILITTVPPNLR.K	618.865	2
							R.NQDLAPNSAEQASILSLVTK.I	700.681	3
							K.ILPTLEAVAALGNK.V	705.396	2
							K.INNVIDNLIVAPGTFEVQIEEVR.Q	861.767	3
O15479	Homo sapiens	Melanoma-associated antigen B2	80/319 residues	0.2508	224	35255	R.APTTAAAAAAGVSSTK.S	458.895	3
							K.SPSEDPLTR.K	501.227	2
							K.NASSSQASTSTK.S	584.755	2
							R.APTTAAAAAAGVSSTK.S	687.839	2
							K.VLEFLAK.V	410.238	2
							R.FQFLWGPR.A	525.76	2
							K.SGSLVQFLLYK.Y	627.836	2
							K.VDLTDEESLLSSWDFPR.R	670.298	3
							K.VDLTDEESLLSSWDFPR.R	1004.94	2
P31943	Homo sapiens	Heterogeneous nuclear ribonucleoprotein H	59/449 residues	0.1314	198	49198	K.IQNGAQGIR.F	478.265	2
							K.HTGPNSPDTANDGFVR.L	562.239	3
							R.STGEAFVQFASQEIAEK.A	921.415	2
							R.ATENDIYNFFSPLNPVR.V	666.642	3
							R.ATENDIYNFFSPLNPVR.V	999.455	2
P67809	Homo sapiens	Nuclease-sensitive element-binding protein 1	70/324 residues	0.216	192	35903	R.EDGNEEDKENQGDETQGQQPPQR.R	876.673	3
							K.AADPPAENSSAPEAEQGGAE.-	949.87	2
							R.NGYGFINR.N	471.21	2
							K.GAEAANVTGPGGVPVQGSK.Y	565.939	3
							K.GAEAANVTGPGGVPVQGSK.Y	848.404	2
P60228	Homo sapiens	Eukaryotic translation initiation factor 3 subunit E	79/445 residues	0.1775	188	52187	R.VLVPATDR.N	435.739	2
							R.TTVVAQLK.Q	430.249	2
							K.NLYSDDIPHALR.E	471.892	3
							R.YLTTAVITNK.D	562.299	2
							R.MLFDYLADK.H	558.256	2
							R.HLVFPLLEFLSVK.E	514.624	3
							K.LASEILMQNWDAAMEDLTR.L	736.665	3
O00303	Homo sapiens	Eukaryotic translation initiation factor 3 subunit F	86/357 residues	0.2409	170	37540	K.VSADNTVGR.F	459.72	2
							K.YAYYDTER.I	540.716	2
							R.EAPNPIHLTVDTSLQNGR.M	654.648	3
							R.VIGLSSDLQQVGGASAR.I	553.281	3
							R.LHPVILASIVDSYER.R	571.297	3
							R.VIGLSSDLQQVGGASAR.I	829.417	2
							R.IQDALSTVLQYAEDVLSGK.V	684.341	3
							R.IQDALSTVLQYAEDVLSGK.V	1025.5	2
P60709	Homo sapiens	Actin, cytoplasmic 1	69/375 residues	0.184	156	41710	K.AGFAGDDAPR.A	488.709	2
							K.DSYVGDEAQSK.R	599.742	2
							K.IWHHTFYNELR.V	506.235	3
							R.GYSFTTTAER.E	566.746	2
							K.EITALAPSTMK.I	581.291	2
							K.SYELPDGQVITIGNER.F	597.613	3
							K.SYELPDGQVITIGNER.F	895.915	2
Q9Y295	Homo sapiens	Developmentally-regulated GTP-binding protein 1	51/367 residues	0.139	152	40517	K.DHTLEDEDVIQIVK.K	552.262	3
							R.IGFVGFPSVGK.S	554.294	2
							K.IIENELEGFGIR.L	695.347	2
							K.IQLLDLPGIIEGAK.D	740.415	2
Q9UQ80	Homo sapiens	Proliferation-associated protein 2G4	72/394 residues	0.1827	152	43759	K.MGGDIANR.V	417.186	2
							K.ALLQSSASR.K	466.745	2
							R.AFFSEVER.R	492.725	2
							K.GDAMIMEETGK.I	591.24	2
							K.SEMEVQDAELK.A	639.774	2
							K.HELLQPFNVLYEK.E	543.941	3
							K.FTVLLMPNGPMR.I	688.341	2
P39023	Homo sapiens	60S ribosomal protein L3	89/403 residues	0.2208	148	46080	K.FIDTTSK.F	406.198	2
							K.AGMTHIVR.E	442.726	2
							K.NNASTDYDLSDK.S	671.766	2
							K.AHLMEIQVNGGTVAEK.L	566.273	3
							K.SINPLGGFVHYGEVTNDFVMLK.G	813.383	3
							R.LEQQVPVNQVFGQDEMIDVIGVTK.G	896.43	3
P41091	Homo sapiens	Eukaryotic translation initiation factor 2 subunit 3	94/472 residues	0.1992	123	51077	K.LTPLSHEVISR.Q	417.891	3
							K.VGQEIEVRPGIVSK.D	504.272	3
							K.NEVLMVNIGSLSTGGR.V	823.88	2
							K.IVSLFAEHNDLQYAAPGGLIGVGTK.I	857.76	3
							K.EQYEQILAFVQGTVAEGAPIIPISAQLK.Y	1005.51	3
Q9UHD8	Homo sapiens	Septin-9	81/586 residues	0.1382	121	65361	K.SVQPTSEER.I	516.733	2
							K.EFDEDSEDR.L	571.197	2
							K.FINDQYEK.Y	528.734	2
							K.DITSSIHFEAYR.V	480.22	3
							K.STLINTLFK.S	518.788	2
							R.ITADLLSNGIDVYPQK.E	873.934	2
							K.APVDFGYVGIDSILEQMR.R	670.982	3
							K.APVDFGYVGIDSILEQMR.R	1005.47	2
P68363	Homo sapiens	Tubulin alpha-1B chain	48/451 residues	0.1064	113	50120	K.DVNAAIATIK.T	508.274	2
							K.EIIDLVLDR.I	543.295	2
							R.LISQIVSSITASLR.F	496.614	3
							R.AVFVDLEPTVIDEVR.T	567.953	3
							R.LISQIVSSITASLR.F	744.416	2
							R.AVFVDLEPTVIDEVR.T	851.424	2
P20042	Homo sapiens	Eukaryotic translation initiation factor 2 subunit 2	54/333 residues	0.1622	106	38364	K.TGFQAVTGK.R	454.729	2
							K.EVEPEPTEDKDLEADEEDTR.K	782.978	3
							R.DYTYEELLNR.V	658.288	2
							K.DASDDLDDLNFFNQK.K	878.855	2
P07437	Homo sapiens	Tubulin beta chain	30/444 residues	0.0676	105	49639	R.ISVYYNEATGGK.Y	651.298	2
							K.GHYTEGAELVDSVLDVVR.K	653.643	3
P39656	Homo sapiens	Dolichyl-diphosphooligosaccharide--protein glycosyltransferase 48 kDa subunit	33/456 residues	0.0724	105	50769	K.TADDPSLSLIK.Y	580.291	2
							R.TLVLLDNLNVR.E	635.357	2
							K.LPDVYGVFQFK.V	656.826	2
P22695	Homo sapiens	Cytochrome b-c1 complex subunit 2, mitochondrial	52/453 residues	0.1148	105	48413	R.LTSSLTTK.G	425.731	2
							K.TIAQGNLSNTDVQAAK.N	815.891	2
							R.MALIGLGVSHPVLK.Q	478.938	3
							R.YEDFSNLGTTHLLR.L	555.925	3
Q3ZBS7	Bos taurus	Vitronectin	27/484 residues	0.0558	100	54065	R.FQDGVLEPDFPR.N	710.32	2
							R.DVWGIEGPIDAAFTR.V	823.882	2
O75821	Homo sapiens	ukaryotic translation initiation factor 3 subunit G	22/320 residues	0.0688	91	35589	R.VTNLSEDTR.E	517.74	2
							K.ELAEQLGLSTGEK.E	687.836	2
O75477	Homo sapiens	Erlin-1	24/346 residues	0.0694	89	38901	R.SVQTTLQTDEVK.N	674.826	2
							R.ISEIEDAAFLAR.E	667.827	2
P09471	Homo sapiens	Guanine nucleotide-binding protein G(o) subunit alpha	23/354 residues	0.065	87	40025	K.TTGIVETHFTFK.N	460.893	3
							K.LLLLGAGESGK.S	529.297	2
P26641	Homo sapiens	Elongation factor 1-gamma	47/437 residues	0.1076	86	50087	R.KLDPGSEETQTLVR.E	524.926	3
							K.ALIAAQYSGAQVR.V	674.348	2
							K.YSNEDTLSVALPYFWEHFDK.D	821.018	3
P07910	Homo sapiens	Heterogeneous nuclear ribonucleoproteins C1/C2	21/306 residues	0.0686	86	33650	R.AAVAGEDGR.M	423.196	2
							R.VFIGNLNTLVVK.K	658.877	2
P31930	Homo sapiens	Cytochrome b-c1 complex subunit 1, mitochondrial	61/480 residues	0.1271	65	52612	R.ADLTEYLSTHYK.A	480.888	3
							R.MVLAAAGGVEHQQLLDLAQK.H	698.355	3
							R.DVVFNYLHATAFQGTPLAQAVEGPSENVR.K	1044.49	3
Q14103	Homo sapiens	Heterogeneous nuclear ribonucleoprotein D0	34/355 residues	0.0958	65	38410	K.IFVGGLSPDTPEEK.I	744.855	2
							K.MFIGGLSWDTTK.K	678.311	2
							R.GFGFVLFK.E	457.744	2
Q9UH03	Homo sapiens	Neuronal-specific septin-3	19/358 residues	0.0531	62	40678	K.STLVNTLFK.S	511.779	2
							K.VVNIIPVIAK.A	533.336	2
Q15365	Homo sapiens	Poly(rC)-binding protein 1	21/356 residues	0.059	60	37474	K.EVGSIIGK.K	401.719	2
							R.IITLTGPTNAIFK.A	694.885	2
Q9H3Q1	Homo sapiens	Cdc42 effector protein 4	19/356 residues	0.0534	59	37957	K.ANDGEGGDEEAGTEEAVPR.R	951.864	2
Q9P258	Homo sapiens	Protein RCC2	15/522 residues	0.0287	58	56049	K.AGGAAVVITEPEHTK.E	494.245	3
O96008	Homo sapiens	Mitochondrial import receptor subunit TOM40 homolog	17/361 residues	0.0471	57	37869	K.LPPLPLTLALGAFLNHR.K	615.016	3
P31689	Homo sapiens	DnaJ homolog subfamily A member 1	44/397 residues	0.1108	54	44839	K.NVVHQLSVTLEDLYNGATR.K	710.681	3
							K.ITFHGEGDQEPGLEPGDIIIVLDQK.D	907.764	3
P26196	Homo sapiens	Probable ATP-dependent RNA helicase DDX6	44/483 residues	0.0911	52	54382	R.LDDTVHVVIATPGR.I	498.257	3
							K.SGAYLIPLLER.L	616.335	2
							K.LLSQDFVQIMEDIILTLPK.N	739.719	3
P55010	Homo sapiens	Eukaryotic translation initiation factor 5	19/431 residues	0.0441	47	49192	K.VLTLSDDLER.T	580.792	2
							R.VNILFDFVK.K	547.798	2
Q12824	Homo sapiens	SWI/SNF-related matrix-associated actin-dependent regulator of chromatin subfamily B member 1	7/385 residues	0.0182	46	44113	R.LATVEER.K	409.191	2
O00515	Homo sapiens	Ladinin-1	7/517 residues	0.0135	46	57097	K.IAVSEKR.N	401.693	2
P15170	Homo sapiens	Eukaryotic peptide chain release factor GTP-binding subunit ERF3A	8/499 residues	0.016	45	55720	R.LPIVDKYK.D	488.261	2
Q9NX58	Homo sapiens	Cell growth-regulating nucleolar protein	25/379 residues	0.066	45	43588	K.VHNESILDQVWNIFSEASNSEPVNK.E	953.097	3
Q8TF72	Homo sapiens	Protein Shroom3	9/1996 residues	0.0045	44	216724	R.SSPATADKR.Q	466.727	2
Q9UJZ1	Homo sapiens	Stomatin-like protein 2, mitochondrial	25/356 residues	0.0702	43	38510	R.ATVLESEGTR.E	531.754	2
							R.ILEPGLNILIPVLDR.I	837.98	2
P49821	Homo sapiens	NADH dehydrogenase [ubiquinone] flavoprotein 1, mitochondrial	10/464 residues	0.0216	42	50785	R.EAYEAGLIGK.N	525.758	2
Q9UKX3	Homo sapiens	Myosin-13	19/1938 residues	0.0098	41	223465	K.SELKMEIDDMASNIEALSK.S	708.679	3
P42166	Homo sapiens	Lamina-associated polypeptide 2, isoform alpha	16/694 residues	0.0231	40	75446	K.TVVSHSLTTLGLEVAK.Q	552.297	3
P62495	Homo sapiens	Eukaryotic peptide chain release factor subunit 1	27/437 residues	0.0618	40	49000	K.LVDISYGGENGFNQAIELSTEVLSNVK.F	966.455	3

## Sheet: HCT116_7
ID	Entity	Name	Sequence coverage		Score	Mass	Peptide	Observed	Charge (+)
Q9UHD8	Homo sapiens	Septin-9	218/586 residues	0.372	1164	65361	R.RVELSGPK.A	443.245	2
							R.ATVASSTQK.F	446.724	2
							R.HVDSLSQR.S	471.227	2
							R.LGDSSGPALK.R	472.739	2
							K.SVQPTSEER.I	516.733	2
							K.SITHDIEEK.G	536.189	2
							K.EFDEDSEDR.L	571.197	2
							K.QVENAGAIGPSR.F	599.79	2
							R.RTELSIDISSK.Q	416.884	3
							K.VPEVPTAPATDAAPK.R	488.579	3
							K.ADTLTLEER.V	524.251	2
							K.FINDQYEK.Y	528.734	2
							R.LEPKPQPPVAEATPR.S	543.951	3
							K.EFDEDSEDRLVNEK.F	575.573	3
							R.SFEVEEVETPNSTPPR.R	606.602	3
							K.VPEVPTAPATDAAPK.R	732.365	2
							R.SFEVEEVETPNSTPPR.R	909.901	2
							K.DITSSIHFEAYR.V	480.22	3
							K.STLINTLFK.S	518.788	2
							K.VVNIVPVIAK.A	526.329	2
							R.ITADLLSNGIDVYPQK.E	583.295	3
							R.ITADLLSNGIDVYPQK.E	873.936	2
							K.APVDFGYVGIDSILEQMR.R	670.984	3
							K.APVDFGYVGIDSILEQMR.R	1005.97	2
P42166	Homo sapiens	Lamina-associated polypeptide 2, isoform alpha	304/694 residues	0.438	664	75446	R.NRPPLPAGTNSK.G	417.882	3
							R.SHISDQSPLSSK.R	429.203	3
							K.ETTTGYYK.D	481.709	2
							R.THQALGILSK.T	534.294	2
							R.EATQILSVPK.V	543.294	2
							R.EPLVATNLPGR.G	583.809	2
							K.YGVNPGPIVGTTR.K	665.837	2
							R.EPTPVLGSGAAAAGR.S	677.336	2
							K.VIEEEWQQVDR.Q	715.824	2
							K.SSSSSSQPEHSAMLVSTAASPSLIK.E	830.716	3
							K.SELVANNVTLPAGEQR.K	849.413	2
							K.GPPDFSSDEEREPTPVLGSGAAAAGR.S	857.712	3
							K.TVVSHSLTTLGLEVAK.Q	552.296	3
							K.DVYVQLYLQHLTAR.N	573.626	3
							K.IDASELSFPFHESILK.V	611.631	3
							K.AMQADISQAAQILSSDPSR.T	663.639	3
							K.FQETEFLSPPR.K	675.815	2
							R.AYEAAASALQIATHTAFVAK.A	679.005	3
							M.PEFLEDPSVLTK.D	687.838	2
							K.ALEESESSQLISPPLAQAIR.D	714.025	3
							K.TVVSHSLTTLGLEVAK.Q	827.941	2
							K.ALEESESSQLISPPLAQAIR.D	1070.53	2
							R.DSGSFVAFQNIPGSELMSSFAK.T	774.01	3
P51114	Homo sapiens	Fragile X mental retardation syndrome-related protein 1	170/621 residues	0.2738	517	69678	R.GSNGAFYK.G	422.188	2
							R.IYGESADAVK.K	526.747	2
							K.SSISSVLK.D	410.728	2
							R.KDELSDWSLAGEDDR.E	579.244	3
							K.EISEGDEVEVYSR.A	756.319	2
							R.RGPNYTSGYGTNSELSNPSETESER.K	911.707	3
							R.KVPGVTAIELDEDTGTFR.I	650.318	3
							R.EDLMGLAIGTHGSNIQQAR.K	670.981	3
							K.DVHEDSLTVVFENNWQPER.Q	772.336	3
							R.IFYHPETTQLMILSASEATVK.R	794.054	3
							K.VPGVTAIELDEDTGTFR.I	910.423	2
							R.GFLEFVEDFIQVPR.N	565.944	3
							R.GFLEFVEDFIQVPR.N	848.41	2
P15311	Homo sapiens	Ezrin	195/586 residues	0.3328	503	69370	R.AQEEAER.L	416.678	2
							R.AKEELER.Q	437.718	2
							K.SGYLSSER.L	449.701	2
							K.EAQDDLVK.T	459.216	2
							R.THNDIIHNENMR.Q	498.55	3
							R.IQVWHAEHR.G	588.287	2
							K.IALLEEAR.R	457.753	2
							K.FVIKPIDK.K	480.283	2
							R.ALQLEEER.K	494.241	2
							K.KAPDFVFYAPR.L	437.553	3
							K.LFFLQVK.E	447.761	2
							K.SQEQLAAELAEYTAK.I	551.259	3
							K.IGFPWSEIR.N	552.777	2
							R.EVWYFGLHYVDNK.G	557.253	3
							K.APDFVFYAPR.L	591.781	2
							R.QLLTLSSELSQAR.D	723.376	2
							K.SQEQLAAELAEYTAK.I	826.383	2
							R.EVWYFGLHYVDNK.G	835.876	2
							K.IAQDLEMYGINYFEIK.N	649.97	3
							K.GTDLWLGVDALGLNIYEK.D	659.995	3
							K.FYPEDVAEELIQDITQK.L	680.317	3
							K.KGTDLWLGVDALGLNIYEK.D	702.691	3
							K.FYPEDVAEELIQDITQK.L	1019.97	2
P13010	Homo sapiens	X-ray repair cross-complementing protein 5	196/732 residues	0.2676	434	82652	K.EEASGSSVTAEEAK.K	697.793	2
							R.ANPQVGVAFPHIK.H	459.91	3
							K.VITMFVQR.Q	497.264	2
							R.LTIGSNLSIR.I	537.299	2
							K.DQVTAQEIFQDNHEDGPTAK.K	748.653	3
							K.SQLDIIIHSLK.K	422.905	3
							R.HIEIFTDLSSR.F	439.883	3
							K.SQLDIIIHSLK.K	633.852	2
							R.HIEIFTDLSSR.F	659.321	2
							K.TDTLEDLFPTTK.I	690.826	2
							K.TEQGGAHFSVSSLAEGSVTSVGSVNPAENFR.V	1041.46	3
							R.HLMLPDFDLLEDIESK.I	639.301	3
							K.YAPTEAQLNAVDALIDSMSLAK.K	774.702	3
							K.IQPGSQQADFLDALIVSMDVIQHETIGK.K	1018.82	3
P11940	Homo sapiens	Polyadenylate-binding protein 1	206/636 residues	0.3239	413	70626	K.AVDEMNGK.E	432.185	2
							K.VMTDESGK.S	433.684	2
							K.AVTEMNGR.I	439.197	2
							K.FGPALSVK.V	409.728	2
							R.KEFSPFGTITSAK.V	471.57	3
							K.VDEAVAVLQAHQAK.E	493.586	3
							K.MNGMLLNDR.K	532.237	2
							R.SKVDEAVAVLQAHQAK.E	565.292	3
							K.GYGFVHFETQEAAER.A	580.916	3
							K.NLDDGIDDER.L	581.234	2
							K.NFGEDMDDER.L	614.211	2
							K.SGVGNIFIK.N	467.756	2
							R.IVATKPLYVALAQR.K	515.3	3
							R.LFPLIQAMHPTLAGK.I	546.294	3
							K.FSPAGPILSIR.V	579.317	2
							R.ALDTMNFDVIK.G	633.802	2
							K.EFSPFGTITSAK.V	642.804	2
							R.SLGYAYVNFQQPADAER.A	643.62	3
							R.SLGYAYVNFQQPADAER.A	964.926	2
							K.ITGMLLEIDNSELLHMLESPESLR.S	914.437	3
P40227	Homo sapiens	T-complex protein 1 subunit zeta	110/531 residues	0.2072	388	57988	R.GLQDVLR.T	400.721	2
							R.ETLIDVAR.T	458.743	2
							K.TEVNSGFFYK.S	596.266	2
							K.ALQFLEEVK.V	538.784	2
							K.VLAQNSGFDLQETLVK.I	587.963	3
							K.GIDPFSLDALSK.E	631.814	2
							K.VLAQNSGFDLQETLVK.I	881.942	2
							R.AQLGVQAFADALLIIPK.V	590.332	3
							R.AQLGVQAFADALLIIPK.V	884.991	2
							K.VHAELADVLTEAVVDSILAIK.K	736.389	3
P00761	Sus scrofa	Trypsin	76/231 residues	0.329	368	24394	K.LSSPATLNSR.V	523.267	2
							R.VATVSLPR.S	421.744	2
							R.LGEHNIDVLEGNEQFINAAK.I	738.014	3
							K.IITHPNFNGNTLDNDIMLIK.L	762.039	3
							R.SCAAAGTECLISGWGNTK.S	884.365	2
P12956	Homo sapiens	X-ray repair cross-complementing protein 6	196/609 residues	0.3218	359	69799	R.ETNEPVK.T	408.297	2
							K.ALKPPPIK.L	432.274	2
							R.SDSFENPVLQQHFR.N	568.589	3
							K.KQELLEALTK.H	586.827	2
							R.IMLFTNEDNPHGNDSAK.A	634.937	3
							K.ELVYPPDYNPEGK.V	760.84	2
							K.KPGGFDISLFYR.D	467.235	3
							R.LGSLVDEFK.E	504.256	2
							K.NIYVLQELDNPGAK.R	525.261	3
							R.DSLIFLVDASK.A	604.31	2
							K.NIYVLQELDNPGAK.R	787.388	2
							R.TFNTSTGGLLLPSDTK.R	826.401	2
							R.DLLAVVFYGTEK.D	452.232	3
							R.DTGIFLDLMHLK.K	468.237	3
							R.DLLAVVFYGTEK.D	677.843	2
							K.IQVTPPGFQLVFLPFADDK.R	711.696	3
							R.NLEALALDLMEPEQAVDLTLPK.V	808.737	3
P50990	Homo sapiens	T-complex protein 1 subunit theta	125/548 residues	0.2281	350	59583	K.ETEGDVTSVK.D	532.74	2
							K.HFSGLEEAVYR.N	436.538	3
							K.TVGATALPR.L	443.246	2
							R.LVPGGGATEIELAK.Q	677.859	2
							K.AIADTGANVVVTGGK.V	686.85	2
							K.YNIMLVR.L	454.74	2
							R.DIDEVSSLLR.T	573.784	2
							K.FAEAFEAIPR.A	575.779	2
							K.EDGAISTIVLR.G	587.308	2
							K.NVGLDIEAEVPAVK.D	727.374	2
							K.DMLEAGILDTYLGK.Y	769.866	2
P11142	Homo sapiens	Heat shock cognate 71 kDa protein	159/646 residues	0.2461	340	70854	K.ITITNDK.G	402.712	2
							R.MVQEAEK.Y	417.689	2
							K.VEIIANDQGNR.T	410.2	3
							K.SQIHDIVLVGGSTR.I	494.59	3
							K.STAGDTHLGGEDFDNR.M	564.559	3
							K.VEIIANDQGNR.T	614.796	2
							K.SQIHDIVLVGGSTR.I	741.38	2
							R.TTPSYVAFTDTER.L	744.328	2
							K.NQVAMNPTNTVFDAK.R	825.372	2
							K.LLQDFFNGK.E	541.269	2
							R.IINEPTAAAIAYGLDK.K	553.951	3
							R.FEELNADLFR.G	627.29	2
							K.TVTNAVVTVPAYFNDSQR.Q	661.649	3
							R.IINEPTAAAIAYGLDK.K	830.422	2
							K.TVTNAVVTVPAYFNDSQR.Q	991.968	2
							K.SINPDEAVAYGAAVQAAILSGDK.S	754.362	3
							K.SINPDEAVAYGAAVQAAILSGDK.S	1131.04	2
P02545	Homo sapiens	Prelamin-A/C	206/664 residues	0.3102	338	74095	R.LVEIDNGK.Q	444.229	2
							K.LLEGEEER.L	487.725	2
							R.VAVEEVDEEGK.F	602.269	2
							R.SGAQASSTPLSPTR.I	680.323	2
							K.EELDFQK.N	454.706	2
							R.DLEDSLAR.E	459.714	2
							R.LADALQELR.A	514.772	2
							R.SLETENAGLR.L	545.26	2
							K.EAALSTALSEK.R	560.279	2
							R.NSNLVGAAHEELQQSR.I	585.273	3
							R.SVGGSGGGSFGDNLVTR.S	783.851	2
							K.ASASGSGAQVGGPISSGSSASSVTVTR.S	789.028	3
							R.LKDLEALLNSK.E	415.233	3
							K.LALDMEIHAYR.K	444.549	3
							K.DLEALLNSK.E	501.76	2
							R.IDSLSAQLSQLQK.Q	715.872	2
							K.AGQVVTIWAAGAGATHSPPTDLVWK.A	845.415	3
Q13283	Homo sapiens	Ras GTPase-activating protein-binding protein 1	181/466 residues	0.3884	328	52132	R.EAGEQGDIEPR.R	600.757	2
							K.FYVHNDIFR.Y	404.191	3
							K.NLPPSGAVPVTGIPPHVVK.V	627.345	3
							R.HPDSHQLFIGNLPHEVDK.S	695.327	3
							K.NSSYVHGGLDSNGKPADAVYGQK.E	789.019	3
							K.DFFQSYGNVVELR.I	525.242	3
							R.TFSWASVTSK.N	557.263	2
							K.SSSPAPADIAQTVQEDLR.T	628.959	3
							K.DFFQSYGNVVELR.I	787.359	2
							R.FMQTFVLAPEGSVANK.F	869.915	2
							K.SSSPAPADIAQTVQEDLR.T	942.934	2
							R.YQDEVFGGFVTEPQEESEEEVEEPEER.Q	1073.09	3
							K.LPNFGFVVFDDSEPVQK.V	646.638	3
							K.LPNFGFVVFDDSEPVQK.V	969.952	2
P61978	Homo sapiens	Heterogeneous nuclear ribonucleoprotein K	130/463 residues	0.2808	308	50944	R.ENTQTTIK.L	467.729	2
							R.NTDEMVELR.I	553.743	2
							K.IDEPLEGSEDR.I	630.268	2
							R.TDYNASVSVPDSSGPER.I	890.87	2
							R.LLIHQSLAGGIIGVK.G	506.968	3
							R.GSYGDLGGPIITTQVTIPK.D	639.996	3
							R.ILSISADIETIGEILK.K	572.315	3
							K.IILDLISESPIK.G	671.385	2
							R.ILSISADIETIGEILK.K	858.467	2
							R.IITITGTQDQIQNAQYLLQNSVK.Q	864.102	3
Q9NVI7	Homo sapiens	ATPase family AAA domain-containing protein 3A	69/634 residues	0.1088	255	71325	R.ENADIIR.E	415.707	2
							K.LAQFDYGR.K	485.226	2
							R.ITVLEALR.H	457.772	2
							R.TAGTLFGEGFR.A	578.273	2
							R.LLSRPQDALEGVVLSPSLEAR.V	751.06	3
							R.GLLLFVDEADAFLR.K	526.935	3
							R.GLLLFVDEADAFLR.K	789.903	2
P19338	Homo sapiens	Nucleolin	160/710 residues	0.2254	249	76568	K.GQNQDYR.G	440.684	2
							K.ESFDGSVR.A	448.692	2
							K.EAMEDGEIDGNK.V	654.251	2
							R.LELQGPR.G	406.721	2
							K.ALELTGLK.V	422.746	2
							K.TGISDVFAK.N	469.236	2
							K.NDLAVVDVR.I	500.757	2
							R.SISLYYTGEK.G	580.775	2
							K.EVFEDAAEIR.L	589.768	2
							K.GIAYIEFK.T	470.744	2
							R.KFGYVDFESAEDLEK.A	592.927	3
							K.GFGFVDFNSEEDAK.A	781.316	2
							K.FGYVDFESAEDLEK.A	824.843	2
							K.VEGTEPTTAFNLFVGNLNFNK.S	771.698	3
							K.TLVLSNLSYSATEETLQEVFEK.A	834.732	3
O60506	Homo sapiens	Heterogeneous nuclear ribonucleoprotein Q	101/623 residues	0.1621	241	69560	K.EAAQEAVK.L	423.207	2
							R.TGYTLDVTTGQR.K	656.308	2
							K.AGPIWDLR.L	464.24	2
							K.EQILEEFSK.V	561.768	2
							K.LDEIYVAGLVAHSDLDER.A	672.653	3
							K.DLEGENIEIVFAKPPDQK.R	681.664	3
							R.NLANTVTEEILEK.A	737.37	2
							K.EFNEDGALAVLQQFK.D	854.9	2
P48643	Homo sapiens	T-complex protein 1 subunit epsilon	61/541 residues	0.1128	240	59633	R.FSELTAEK.L	462.721	2
							K.LDVTSVEDYK.A	584.769	2
							K.ISDSVLVDIK.D	544.794	2
							K.LGFAGLVQEISFGTTK.D	556.62	3
							K.LGFAGLVQEISFGTTK.D	834.427	2
							R.WVGGPEIELIAIATGGR.I	869.946	2
P17987	Homo sapiens	T-complex protein 1 subunit alpha	106/556 residues	0.1906	230	60306	R.TSASIILR.G	430.749	2
							K.LGVQVVITDPEK.L	649.35	2
							R.EQLAIAEFAR.S	574.29	2
							K.FATEAAITILR.I	603.326	2
							K.LGVQVVITDPEKLDQIR.Q	641.679	3
							R.YINENLIVNTDELGR.D	881.92	2
							K.EVGDGTTSVVIIAAELLK.N	605.654	3
							K.SVVPGGGAVEAALSIYLENYATSMGSR.E	900.418	3
							K.EVGDGTTSVVIIAAELLK.N	907.978	2
O00425	Homo sapiens	Insulin-like growth factor 2 mRNA-binding protein 3	96/576 residues	0.1667	224	63666	K.IAPAEAPDAK.V	491.745	2
							K.ALQSGPPQSR.R	520.759	2
							R.DQTPDENDQVVVK.I	743.827	2
							K.FTEEIPLK.I	488.755	2
							K.LNGFQLENFTLK.V	712.356	2
							R.MVIITGPPEAQFK.A	715.865	2
							K.ITISPLQELTLYNPER.T	629.991	3
							R.LLVPTQFVGAIIGK.E	728.425	2
							K.ITISPLQELTLYNPER.T	944.481	2
Q3ZBS7	Bos taurus	Vitronectin	65/484 residues	0.1343	220	54065	R.RVDAVIPPYPR.S	428.232	3
							R.FQDGVLEPDFPR.N	710.324	2
							R.DSWVDIFR.L	519.239	2
							R.DVWGIEGPIDAAFTR.V	549.593	3
							R.LLFWGGSYGGAGQPQLISR.N	669.663	3
							R.DVWGIEGPIDAAFTR.V	824.384	2
							R.LLFWGGSYGGAGQPQLISR.N	1003.99	2
Q99832	Homo sapiens	T-complex protein 1 subunit eta	107/543 residues	0.1971	211	59329	R.TATQLAVNK.I	473.254	2
							K.ATISNDGATILK.L	602.312	2
							K.VQGGALEDSQLVAGVAFK.K	596.967	3
							K.LPIGDVATQYFADR.D	783.372	2
							K.VQGGALEDSQLVAGVAFK.K	894.945	2
							K.IALLNVELELK.A	627.865	2
							K.SQDAEVGDGTTSVTLLAAEFLK.Q	751.689	3
							R.VHTVEDYQAIVDAEWNILYDK.L	841.384	3
							K.SQDAEVGDGTTSVTLLAAEFLK.Q	1126.53	2
P27694	Homo sapiens	Replication protein A 70 kDa DNA-binding subunit	133/616 residues	0.2159	209	68095	K.AAGPSLSHTSGGTQSK.V	496.231	3
							R.ATAFNEQVDK.F	561.754	2
							K.ATVMDVKPVDYR.E	465.229	3
							K.VIDQQNGLYR.C	603.296	2
							K.VVTATLWGEDADKFDGSR.Q	656.3	3
							K.DKNEQAFEEVFQNANFR.S	696.303	3
							K.VVPIASLTPYQSK.W	701.876	2
							K.LFSLELVDESGEIR.A	804.392	2
							K.SENLGQGDKPDYFSSVATVVYLR.K	849.392	3
Q9Y262	Homo sapiens	Eukaryotic translation initiation factor 3 subunit L	88/564 residues	0.156	201	66684	R.VSSDVIDQK.V	495.74	2
							K.VSGGPSLEQR.F	515.251	2
							K.VLENIELNKK.S	400.558	3
							R.IDESIHLQLR.E	408.549	3
							K.VFSDEVQQQAQLSTIR.S	617.3	3
							R.IQLLVFK.H	430.769	2
							R.LHSLLGDYYQAIK.V	507.591	3
							K.LAGFLDLTEQEFR.I	769.868	2
P49368	Homo sapiens	T-complex protein 1 subunit gamma	56/545 residues	0.1028	199	60495	K.KGESQTDIEITR.E	459.556	3
							R.AVAQALEVIPR.T	583.828	2
							K.TAVETAVLLLR.I	593.344	2
							K.ELGIWEPLAVK.L	627.837	2
							R.IVLLDSSLEYK.K	640.339	2
P50991	Homo sapiens	T-complex protein 1 subunit delta	123/539 residues	0.2282	198	57888	K.VSNSGITR.V	417.214	2
							R.FSNISAAK.A	419.212	2
							K.LVIEEAER.S	479.747	2
							K.VIDPATATSVDLR.D	679.347	2
							K.GDVTITNDGATILK.Q	709.357	2
							R.ETLLNSATTSLNSK.V	739.862	2
							R.ALIAGGGAPEIELALR.L	775.922	2
							R.DALSDLALHFLNK.M	486.25	3
							R.AFADAMEVIPSTLAENAGLNPISTVTELR.N	1011.15	3
P26599	Homo sapiens	Polypyrimidine tract-binding protein 1	124/531 residues	0.2335	193	57186	R.EGQEDQGLTK.D	552.74	2
							R.GQPIYIQFSNHK.E	478.235	3
							K.NNQFQALLQYADPVSAQHAK.L	748.686	3
							R.VTPQSLFILFGVYGDVQR.V	680.683	3
							R.KLPIDVTEGEVISLGLPFGK.V	704.713	3
							R.IAIPGLAGAGNSVLLVSNLNPER.V	759.405	3
							R.IAIPGLAGAGNSVLLVSNLNPER.V	1138.6	2
							R.IIVENLFYPVTLDVLHQIFSK.F	830.436	3
O00571	Homo sapiens	ATP-dependent RNA helicase DDX3X	101/662 residues	0.1526	190	73198	R.VGSTSENITQK.V	582.278	2
							K.YLVLDEADR.M	547.262	2
							K.SPILVATAVAAR.G	584.836	2
							R.VGNLGLATSFFNER.N	508.914	3
							R.ELAVQIYEEAR.K	660.82	2
							R.VGNLGLATSFFNER.N	762.866	2
							K.DLLDLLVEAK.Q	564.81	2
							R.SFLLDLLNATGK.D	646.343	2
							K.TAAFLLPILSQIYSDGPGEALR.A	778.396	3
Q8NC51	Homo sapiens	Plasminogen activator inhibitor 1 RNA-binding protein	45/408 residues	0.1103	176	44938	K.EAGGGGVGGPGAK.S	507.236	2
							K.SAAQAAAQTNSNAAGK.Q	730.832	2
							R.FDQLFDDESDPFEVLK.A	972.918	2
P04843	Homo sapiens	Dolichyl-diphosphooligosaccharide--protein glycosyltransferase subunit 1	82/607 residues	0.1351	165	68527	K.IDHILDAL.-	455.24	2
							K.VTAEVVLAHLGGGSTSR.A	552.282	3
							K.ALTSEIALLQSR.L	651.353	2
							R.FVDHVFDEQVIDSLTVK.I	664.654	3
							K.TILPAAAQDVYYR.D	740.866	2
							R.ATSFLLALEPELEAR.L	830.422	2
Q92945	Homo sapiens	Far upstream element-binding protein 2	112/711 residues	0.1575	152	73070	K.IQNDAGVR.I	436.717	2
							K.AWEEYYK.K	494.706	2
							K.DAFADAVQR.A	496.726	2
							R.IGGGIDVPVPR.H	540.295	2
							R.SVSLTGAPESVQK.A	651.826	2
							K.LASQGDSISSQLGPIHPPPR.T	686.34	3
							R.GGGGPGGGGPGGGSAGGPSQPPGGGGPGIR.K	757.332	3
							K.AINQQTGAFVEISR.Q	767.377	2
Q9UN86	Homo sapiens	Ras GTPase-activating protein-binding protein 2	39/482 residues	0.0809	131	54088	R.VEAKPEVQSQPPR.V	488.915	3
							K.FYVHNDMFR.Y	410.176	3
							K.LPNFGFVVFDDSEPVQR.I	983.453	2
P26368	Homo sapiens	Splicing factor U2AF 65 kDa subunit	39/475 residues	0.0821	130	53467	K.ELLTSFGPLK.A	552.798	2
							R.LGGLTQAPGNPVLAVQINQDK.N	712.038	3
							K.NFAFLEFR.S	522.251	2
P04844	Homo sapiens	Dolichyl-diphosphooligosaccharide--protein glycosyltransferase subunit 2	67/631 residues	0.1062	123	69241	R.SIVEEIEDLVAR.L	686.847	2
							K.EETVLATVQALQTASHLSQQADLR.S	870.758	3
							K.ASLDRPFTNLESAFYSIVGLSSLGAQVPDAK.K	1085.52	3
Q92499	Homo sapiens	ATP-dependent RNA helicase DDX1	58/740 residues	0.0784	119	82380	K.GHVDILAPTVQELAALEK.E	635.333	3
							R.GIDIHGVPYVINVTLPDEK.Q	694.021	3
							R.FLVLDEADGLLSQGYSDFINR.M	791.368	3
P17844	Homo sapiens	Probable ATP-dependent RNA helicase DDX5	67/614 residues	0.1091	113	69105	R.GLDVEDVK.F	437.714	2
							K.NFYQEHPDLAR.R	463.873	3
							K.TIVFVETK.R	468.757	2
							K.APILIATDVASR.G	613.837	2
							R.TTYLVLDEADR.M	648.305	2
							K.FVINYDYPNSSEDYIHR.I	711.307	3
P30419	Homo sapiens	Glycylpeptide N-tetradecanoyltransferase 1	40/496 residues	0.0806	107	56770	K.GSETDSAQDQPVK.M	681.289	2
							K.AIELFSVGQGPAK.T	658.842	2
							K.GFDVFNALDLMENK.T	806.859	2
Q9NSD9	Homo sapiens	Phenylalanine--tRNA ligase beta subunit	56/589 residues	0.0951	96	66074	K.SHTFPELAYR.K	407.526	3
							K.ASEGPAFFPGR.C	568.26	2
							K.NPGFEIIHGLLDR.I	494.25	3
							K.TYTIANQFPLNK.L	705.352	2
							K.LFEISDIVIK.D	588.828	2
Q9UG63	Homo sapiens	ATP-binding cassette sub-family F member 2	55/623 residues	0.0883	94	71245	R.VALVGPNGAGK.S	491.77	2
							R.ETTEVDLLTK.E	574.786	2
							K.SMLLSAIGK.R	460.252	2
							K.IPPPVIMVQNVSFK.Y	523.616	3
							R.YGLIGLNGIGK.S	553.301	2
							K.IPPPVIMVQNVSFK.Y	784.918	2
Q14444	Homo sapiens	Caprin-1	34/709 residues	0.048	94	78318	R.LNQDQLDAVSK.Y	615.798	2
							K.YQEVTNNLEFAK.E	728.335	2
							K.TVLELQYVLDK.L	660.852	2
O15371	Homo sapiens	Eukaryotic translation initiation factor 3 subunit D	33/548 residues	0.0602	90	63932	R.GAVIATELK.N	451.256	2
							R.IFHTVTTTDDPVIR.K	538.935	3
							K.LGDDIDLIVR.C	564.797	2
Q8WU90	Homo sapiens	Zinc finger CCCH domain-containing protein 15	24/426 residues	0.0563	85	48573	R.DVDETGITVASLER.F	752.851	2
							K.ITLESFLAWK.K	604.318	2
P51659	Homo sapiens	Peroxisomal multifunctional enzyme type 2	49/736 residues	0.0666	84	79636	K.AVANYDSVEEGEK.V	705.798	2
							R.AYALAFAER.G	506.248	2
							R.VVLVTGAGAGLGR.A	585.332	2
							R.GALVVVNDLGGDFK.G	702.356	2
Q12931	Homo sapiens	Heat shock protein 75 kDa, mitochondrial	14/704 residues	0.0199	79	80060	R.GVVDSEDIPLNLSR.E	757.368	2
P35637	Homo sapiens	RNA-binding protein FUS	25/526 residues	0.0475	66	53394	K.LKGEATVSFDDPPSAK.A	554.599	3
							K.AAIDWFDGK.E	511.733	2
P19525	Homo sapiens	Interferon-induced, double-stranded RNA-activated protein kinase	12/551 residues	0.0218	65	62056	K.VLALELFEQITK.G	702.385	2
Q15233	Homo sapiens	Non-POU domain-containing octamer-binding protein	31/471 residues	0.0658	64	54197	R.AVVIVDDR.G	443.738	2
							R.NLPQYVSNELLEEAFSVFGQVER.A	890.419	3
Q9Y285	Homo sapiens	Phenylalanine--tRNA ligase alpha subunit	15/508 residues	0.0295	59	57528	K.LGITQLR.F	400.739	2
							K.LLAEVTLK.T	443.769	2
Q9NQW6	Homo sapiens	Anillin	17/1124 residues	0.0151	56	124122	R.GFLTIFEDVSGFGAWHR.R	646.966	3
Q07065	Homo sapiens	Cytoskeleton-associated protein 4	62/602 residues	0.103	54	65983	R.ISEVLQK.L	408.297	2
							K.IETNENNLESAK.G	681.307	2
							R.LALQALTEK.L	493.78	2
							K.VQEQVHTLLSQDQAQAAR.L	674.66	3
							K.VQSLQATFGTFESILR.S	599.971	3
P28288	Homo sapiens	ATP-binding cassette sub-family D member 3	49/659 residues	0.0744	53	75428	R.FSMGFIDSIIAK.Y	664.83	2
							R.VLGELWPLFGGR.L	672.355	2
							K.GIEGVQVIPLIPGAGEIIIADNIIK.F	848.473	3
P40222	Homo sapiens	Alpha-taxilin	18/546 residues	0.033	53	61853	R.TAQSGALR.D	402.209	2
							K.FEEFQNTLSK.S	621.78	2
Q12906	Homo sapiens	Interleukin enhancer-binding factor 3	23/894 residues	0.0257	51	95279	R.IFVNDDR.H	439.707	2
							K.EPPLSLTIHLTSPVVR.E	586.987	3
Q14157	Homo sapiens	Ubiquitin-associated protein 2-like	9/1087 residues	0.0083	50	114465	R.IDLAVLLGK.T	471.289	2
Q8NI51	Homo sapiens	Transcriptional repressor CTCFL	7/663 residues	0.0106	50	75698	K.LEEEQEK.N	452.707	2
P38646	Homo sapiens	Stress-70 protein, mitochondrial	12/679 residues	0.0177	49	73635	R.AQFEGIVTDLIR.R	681.352	2
Q9UHB9	Homo sapiens	Signal recognition particle subunit SRP68	22/627 residues	0.0351	49	70686	R.IFLLGLADNEAAIVQAESEETK.E	788.049	3
P10809	Homo sapiens	60 kDa heat shock protein, mitochondrial	9/573 residues	0.0157	47	61016	K.VGLQVVAVK.A	456.782	2
Q09161	Homo sapiens	Nuclear cap-binding protein subunit 1	12/790 residues	0.0152	46	91781	R.LFVWEILHSTIR.K	505.272	3
Q9NVA2	Homo sapiens	Septin-11	24/429 residues	0.0559	43	49367	K.DDSYKPIVEYIDAQFEAYLQEELK.I	969.772	3
P28331	Homo sapiens	NADH-ubiquinone oxidoreductase 75 kDa subunit, mitochondrial	27/727 residues	0.0371	43	79417	R.LEEVSPNLVR.Y	578.302	2
							K.ILQDIASGSHPFSQVLK.E	613.981	3
Q8TCS8	Homo sapiens	Polyribonucleotide nucleotidyltransferase 1, mitochondrial	8/783 residues	0.0102	42	85897	K.ALYPVIPR.D	464.768	2
O76094	Homo sapiens	Signal recognition particle subunit SRP72	21/671 residues	0.0313	42	74560	K.LKPTDVGLLAVIANNIITINK.D	740.758	3
Q13724	Homo sapiens	Mannosyl-oligosaccharide glucosidase	12/837 residues	0.0143	41	91861	R.LGPLLDILADSR.H	641.851	2
Q8IV33	Homo sapiens	Uncharacterized protein KIAA0825	8/1275 residues	0.0063	41	147640	R.NFSLPLDK.V	467.212	2

## Sheet: HCT116_8
ID	Entity	Name	Sequence coverage		Score	Mass	Peptide	Observed	Charge (+)
ENSBTAP00000011213	Bos taurus	similar to apolipoprotein B, partial	486/3618 residues	0.1343	899	409608	R.LLVEDAR.I	408.299	2
							K.YNFNSPK.L	435.196	2
							K.LEGTSSLTR.K	482.243	2
							R.VTSLSEGFK.V	484.242	2
							K.LVTQTEGVK.Q	487.764	2
							K.LDNIYSSDK.F	527.738	2
							K.NVDASVTTTAR.V	567.77	2
							R.DPATGQLTGESNLR.F	729.839	2
							K.NLVDVLK.D	400.734	2
							K.ISALVQVR.A	443.264	2
							K.GLALLQEGK.A	464.761	2
							K.LTLDFQNK.K	489.751	2
							K.AEPLAFTFSHDYR.G	518.568	3
							K.LATALSLSNR.F	523.285	2
							R.VPQTDLTFR.H	538.772	2
							K.VTEEINAFR.V	539.762	2
							R.IPSFQINFK.T	547.286	2
							K.YENYELTLK.S	586.775	2
							R.ATGALYDYVNK.Y	607.786	2
							R.IVVSTYLENLK.A	639.846	2
							K.ELSELSLPEFK.V	646.321	2
							R.FELELKPTGEVEQYSAK.A	656.649	3
							K.ITELSTSAQEVIK.S	709.867	2
							K.AQLSDPTLNPLVLK.E	754.912	2
							K.LVAAASTWLQETSR.S	766.879	2
							R.LNTNIAGLASTVDIR.T	779.407	2
							K.AQSVYQELLAQEDR.S	825.383	2
							K.ATLELSLWK.I	530.787	2
							K.VSALLTLAEQTGDWK.L	544.607	3
							R.NQALDFFIK.S	548.276	2
							K.SLQEYLSILANAEGR.G	555.273	3
							R.SEILSLWSPSK.L	623.816	2
							R.LSQQVSDYLSTFNWER.Q	658.296	3
							R.LEVLNFDFQAK.A	662.329	2
							K.INFLGQEVSLNVNTENQK.I	683.331	3
							K.TLSSELHIPDFDIDLGTVLK.V	738.703	3
							K.NLTDFAEQYSIQDWAENLK.T	762.666	3
							R.ALQEATYQTPDFIVPLTDLR.I	764.708	3
							K.YNPLVLENELNAAVSLSGASLK.L	768.384	3
							K.VSALLTLAEQTGDWK.L	816.406	2
							K.SLQEYLSILANAEGR.G	832.404	2
							K.YNPLVLENELNAAVSLSGASLK.L	1152.07	2
							R.SLQDIFQEIESELKR.F	612.3	3
Q09666	Homo sapiens	Neuroblast differentiation-associated protein AHNAK	249/5890 residues	0.0423	559	628699	K.VPDVDIR.G	407.214	2
							K.ADVVVSGPK.V	436.233	2
							K.ADVDVSGPK.M	444.212	2
							K.ADIDVSGPK.V	451.221	2
							K.ANVDISAPK.V	457.737	2
							K.GDVDVSLPK.L	465.235	2
							K.GDMDVSVPK.V	474.213	2
							K.FSMPGFK.A	407.188	2
							K.ISMPDVDLHLK.G	423.214	3
							K.ISMPDFDLHLK.G	439.215	3
							K.VDVEVPDVSLEGPEGK.L	556.93	3
							K.LNVGAPDVTLR.G	577.81	2
							K.VDVNAPDVQAPDWHLK.M	601.95	3
							K.GEGPDVDVNLPK.A	620.293	2
							K.AEGPEVDVNLPK.A	634.31	2
							K.GPHVDVSGPDIDIEGPEGK.L	640.292	3
							K.GEGPEFDVNLSK.A	646.291	2
							K.VDVSAPDVEAHGPEWNLK.M	654.968	3
							K.VDIEGPDVNIEGPEGK.L	834.379	2
							K.VDVEVPDVSLEGPEGK.L	834.891	2
							K.VDVDVPDVNIEGPDAK.L	841.888	2
							K.ISMPDIDLNLK.G	629.817	2
Q00610	Homo sapiens	Clathrin heavy chain 1	256/1675 residues	0.1528	539	191493	K.IYIDSNNNPER.F	667.799	2
							R.IAAYLFK.G	413.252	2
							K.IVLDNSVFSEHR.N	472.9	3
							K.VANVELYYR.A	563.779	2
							K.LLYNNVSNFGR.L	648.818	2
							K.LHIIEVGTPPTGNQPFPK.K	649.335	3
							R.NNLAGAEELFAR.K	652.807	2
							R.LASTLVHLGEYQAAVDGAR.K	657.659	3
							R.GQFSTDELVAEVEK.R	776.354	2
							R.NLQNLLILTAIK.A	677.402	2
							K.SVDPTLALSVYLR.A	717.379	2
							K.YHEQLSTQSLIELFESFK.S	733.676	3
							K.VGYTPDWIFLLR.N	740.877	2
							K.WLLLTGISAQQNR.V	750.394	2
							K.SVNESLNNLFITEEDYQALR.T	786.025	3
							R.RPLIDQVVQTALSETQDPEEVSVTVK.A	961.474	3
							R.FQSVPAQPGQTSPLLQYFGILLDQGQLNK.Y	1063.52	3
Q7KZF4	Homo sapiens	Staphylococcal nuclease domain-containing protein 1	179/910 residues	0.1967	354	101934	R.TDAVDSVVR.D	481.236	2
							K.SLLSAEEAAK.Q	509.757	2
							R.VADISGDTQK.A	517.243	2
							R.NDIASHPPVEGSYAPR.R	570.928	3
							R.ADDADEFGYSR.-	623.235	2
							R.DYVAPTANLDQK.D	667.809	2
							K.GDVGLGLVK.E	429.24	2
							R.SSHYDELLAAEAR.A	487.888	3
							R.LGTLSPAFSTR.V	575.297	2
							K.DTPDEPWAFPAR.E	701.303	2
							R.SEAVVEYVFSGSR.L	715.328	2
							K.VITEYLNAQESAK.S	733.356	2
							K.VWAHYEEQPVEEVMPVLEEK.E	814.7	3
							R.NLPGLVQEGEPFSEEATLFTK.E	769.696	3
P00761	Sus scrofa	Trypsin	76/231 residues	0.329	332	24394	R.VATVSLPR.S	421.744	2
							K.LSSPATLNSR.V	523.268	2
							R.LGEHNIDVLEGNEQFINAAK.I	738.015	3
							R.SCAAAGTECLISGWGNTK.S	884.365	2
							R.LGEHNIDVLEGNEQFINAAK.I	1106.52	2
							K.IITHPNFNGNTLDNDIMLIK.L	762.04	3
Q14444	Homo sapiens	Caprin-1	99/709 residues	0.1396	266	78318	K.LGDDEVR.T	402.185	2
							K.LDDYQER.M	469.699	2
							R.LNQDQLDAVSK.Y	615.799	2
							K.QILGVIDK.K	443.26	2
							K.YQEVTNNLEFAK.E	486.226	3
							R.SFMALSQDIQK.T	634.3	2
							K.YQEVTNNLEFAK.E	728.335	2
							R.QFMAETQFTSGEK.E	751.802	2
							K.TVLELQYVLDK.L	660.852	2
							R.LNEQYEHASIHLWDLLEGK.E	766.024	3
Q04637	Homo sapiens	Eukaryotic translation initiation factor 4 gamma 1	128/1599 residues	0.0801	236	175382	R.GGPGGELPR.G	420.207	2
							K.FIGELFK.L	427.231	2
							K.VPTTEKPTVTVNFR.K	530.277	3
							K.DITEEIMSGAR.T	611.272	2
							R.FSALQQAVPTESTDNRR.V	640.635	3
							K.ITKPGSIDSNNQLFAPGGR.L	657.99	3
							K.GVIDLIFEK.A	517.283	2
							K.EAVGDLLDAFK.E	589.288	2
							R.FMLQDVLDLR.G	625.312	2
							R.VFDWIEANLSEQQIVSNTLVR.A	821.399	3
P78527	Homo sapiens	DNA-dependent protein kinase catalytic subunit	162/4128 residues	0.0392	215	468788	R.LPSNTLDR.L	458.233	2
							K.TSALSDETK.N	476.221	2
							R.LLQIIER.Y	442.767	2
							R.LSFAVPFR.E	468.753	2
							R.LLEEALLR.L	478.776	2
							R.GIFTSEIGTK.Q	526.766	2
							R.VTELALTASDR.Q	588.297	2
							R.LLALNSLYSPK.I	609.837	2
							K.LNESTFDTQITK.K	698.828	2
							R.KEEENASVIDSAELQAYPALVVEK.M	878.419	3
							K.AALSALESFLK.Q	575.307	2
							K.NLDLAVLELMQSSVDNTK.M	663.983	3
							K.NLLIFENLIDLK.R	723.398	2
							R.LGLIEWLENTVTLK.D	814.935	2
Q15149	Homo sapiens	Plectin	204/4684 residues	0.0436	212	531466	K.ATVSAPFGK.F	439.227	2
							K.LTVEEAVR.M	458.744	2
							R.VPVDVAYR.R	459.741	2
							R.LAQGHTTVDELAR.R	470.901	3
							R.SLQEEHVAVAQLR.E	493.919	3
							R.LLEAAAQSTK.G	516.274	2
							R.VVIVDPETGK.E	528.782	2
							R.VLADPSDDTK.G	530.743	2
							K.AQLEPVASPAK.K	555.792	2
							R.AALAHSEEVTASQVAATK.T	595.625	3
							R.LTAEDLFEAR.I	582.778	2
							K.AQVEQELTTLR.L	644.327	2
							K.AGVAAPATQVAQVTLQSVQR.R	666.016	3
							K.IIITVVEEQEQK.G	714.877	2
							R.LQEAGILSAEELQR.L	778.89	2
							K.LQNVQIALDYLR.H	723.384	2
							R.APVPASELLASGVLSR.A	783.919	2
Q14152	Homo sapiens	Eukaryotic translation initiation factor 3 subunit A	111/1382 residues	0.0803	191	166468	R.LGDSSLSR.K	417.706	2
							R.ELEIEER.E	459.218	2
							R.LESLNIQR.E	486.762	2
							K.VSTVFWK.S	433.728	2
							K.AVEDIHGLFSLSK.K	472.573	3
							R.ANEFLEVGK.K	503.747	2
							R.LTSLVPFVDAFQLER.A	579.297	3
							R.LLQQVSQIYQSIEFSR.L	647.326	3
							R.VLLATLSIPITPER.T	761.937	2
							R.LTSLVPFVDAFQLER.A	868.441	2
							K.DLYNWLEVEFNPLK.L	890.917	2
Q14694	Homo sapiens	Ubiquitin carboxyl-terminal hydrolase 10	82/798 residues	0.1028	177	87080	K.LTISNGPK.N	415.229	2
							R.ESVQGYTTK.T	506.734	2
							R.SVVYQQSSK.E	513.249	2
							R.DIRPGAAFEPTYIYR.L	590.284	3
							K.NIEYPVDLEISK.E	710.348	2
							R.TVQDALESLVAR.E	651.334	2
							R.IEFGVDEVIEPSDTLPR.T	958.953	2
P09874	Homo sapiens	Poly [ADP-ribose] polymerase 1	93/1014 residues	0.0917	172	113012	K.LTVNPGTK.S	415.229	2
							R.VGTVIGSNK.L	437.739	2
							K.LQLLEDDKENR.Y	458.238	3
							K.KPPLLNNADSVQAK.V	499.2	3
							K.AEPVEVVAPR.G	533.78	2
							R.VVSEDFLQDVSASTK.S	812.879	2
							K.VFSATLGLVDIVK.G	681.381	2
							R.TTNFAGILSQGLR.I	689.355	2
Q9BXJ9	Homo sapiens	N-alpha-acetyltransferase 15, NatA auxiliary subunit	78/866 residues	0.0901	171	101208	K.EAAEIYR.A	426.203	2
							R.LEDAADVYR.G	526.239	2
							R.IAIEIYLK.L	481.785	2
							R.LPLNFLSGEK.F	559.296	2
							K.VETPLEEAIK.F	564.792	2
							R.AIELATTLDESLTNR.N	823.904	2
							K.FLLMLQSVK.R	539.802	2
							R.DLSLLQIQMR.D	608.819	2
O60841	Homo sapiens	Eukaryotic translation initiation factor 5B	115/1220 residues	0.0943	166	138742	K.EVEAAQGVK.I	465.733	2
							K.LLQAQGVEVPSK.D	634.842	2
							K.NKPGPNIESGNEDDDASFK.I	678.618	3
							K.TSEVPYAGINIGPVHK.K	561.617	3
							K.ILPQYIFNSR.D	625.827	2
							K.VTVDTGVIPASEEK.A	723.358	2
							K.EGDTIIVPGVEGPIVTQIR.G	665.014	3
							R.IFSAEIIYHLFDAFTK.Y	638.982	3
Q99613	Homo sapiens	Eukaryotic translation initiation factor 3 subunit C	69/913 residues	0.0756	158	105278	K.LGSLVENNER.V	565.776	2
							K.DAHNALLDIQSSGR.A	499.201	3
							R.FEELTNLIR.T	567.793	2
							K.ELLGQGLLLR.S	556.326	2
							R.AAQIELLQLLVQIAAENNLGEGVIVK.I	916.163	3
Q00839	Homo sapiens	Heterogeneous nuclear ribonucleoprotein U	72/825 residues	0.0873	146	90528	K.LNTLLQR.A	429.227	2
							R.NFILDQTNVSAAAQR.R	549.935	3
							R.GYFEYIEENK.Y	646.275	2
							R.NFILDQTNVSAAAQR.R	824.399	2
							K.SSGPTSLFAVTVAPPGAR.Q	857.93	2
							K.EKPYFPIPEEYTFIQNVPLEDR.V	909.089	3
Q08211	Homo sapiens	ATP-dependent RNA helicase A	70/1270 residues	0.0551	107	140869	R.LSMSQLNEK.E	525.251	2
							R.DVVQAYPEVR.I	588.285	2
							R.YQILPLHSQIPR.E	488.932	3
							R.LGGIGQFLAK.A	502.284	2
							K.TTQVPQFILDDFIQNDR.A	683.985	3
							R.DINTDFLLVVLR.D	709.879	2
P39023	Homo sapiens	60S ribosomal protein L3	43/403 residues	0.1067	105	46080	K.FIDTTSK.F	406.2	2
							K.NNASTDYDLSDK.S	671.768	2
							R.LEQQVPVNQVFGQDEMIDVIGVTK.G	896.432	3
P55884	Homo sapiens	Eukaryotic translation initiation factor 3 subunit B	61/814 residues	0.0749	95	92424	R.GIALWGGEK.F	465.741	2
							R.VNLFTDFDK.Y	549.759	2
							K.ITNDFYPEEDGK.T	714.294	2
							K.GYIFLEYASPAHAVDAVK.N	651.317	3
							K.GTQGVVTNFEIFR.M	734.357	2
Q14157	Homo sapiens	Ubiquitin-associated protein 2-like	132/1087 residues	0.1214	94	114465	K.GFGDVGEAK.G	440.199	2
							R.GQENGLDGTK.S	509.726	2
							R.AINVLLEGNPDTHSWEMVGK.K	737.677	3
							R.DGSLASNPYSGDLTK.F	762.836	2
							K.IFTASNVSSVPLPAENVTITAGQR.I	825.08	3
							K.NGFSSVQATQLQTTQSVEGATGSAVK.S	866.403	3
							R.TATEEWGTEDWNEDLSETK.I	1121.44	2
							R.IDLAVLLGK.T	471.289	2
Q7L2E3	Homo sapiens	ATP-dependent RNA helicase DHX30	30/1194 residues	0.0251	87	133854	K.VIQIATSSSTAK.N	603.32	2
							K.AVDEAVILLQEIGVLDQR.E	661.013	3
Q92900	Homo sapiens	Regulator of nonsense transcripts 1	50/1129 residues	0.0443	86	124267	K.LVNTINPGAR.F	527.786	2
							K.TVTSATIVYHLAR.Q	477.921	3
							K.TFAVDETSVSGYIYHK.L	606.277	3
							R.NVFLLGFIPAK.A	609.844	2
Q9NQW6	Homo sapiens	Anillin	91/1124 residues	0.081	84	124122	K.TQSLPVTEK.V	501.759	2
							K.STLSQTVPSK.G	524.269	2
							K.GSLEEAEAER.L	545.735	2
							R.LLLIATGK.R	414.768	2
							K.GSVTLSEIR.L	481.252	2
							K.LNQVLVDIR.L	535.303	2
							K.ITLFLEEDK.S	554.281	2
							R.DLLYSIDAYR.S	614.793	2
							R.GFLTIFEDVSGFGAWHR.R	647.296	3
Q96N67	Homo sapiens	Dedicator of cytokinesis protein 7	58/2140 residues	0.0271	76	242407	R.TPNEEIDR.Q	487.218	2
							K.GYQTSPDLR.L	518.739	2
							K.LGTGFNPNTLDK.Q	638.811	2
							K.FFALVNALDEHLFPVR.I	630.32	3
							K.TILTYAEEDLELR.E	783.38	2
O95782	Homo sapiens	AP-2 complex subunit alpha-1	19/977 residues	0.0194	66	107478	R.ALLLSTYIK.F	511.301	2
							R.GLAVFISDIR.N	545.798	2
P19338	Homo sapiens	Nucleolin	87/710 residues	0.1225	64	76568	R.LELQGPR.G	406.722	2
							K.ALELTGLK.V	422.746	2
							K.TGISDVFAK.N	469.237	2
							R.SISLYYTGEK.G	580.777	2
							K.EVFEDAAEIR.L	589.768	2
							K.VEGTEPTTAFNLFVGNLNFNK.S	771.694	3
							K.TLVLSNLSYSATEETLQEVFEK.A	834.729	3
Q3ZBS7	Homo sapiens	Vitronectin	27/484 residues	0.0558	60	54065	R.FQDGVLEPDFPR.N	710.322	2
							R.DVWGIEGPIDAAFTR.V	823.883	2
P51116	Homo sapiens	Fragile X mental retardation syndrome-related protein 2	36/673 residues	0.0535	59	74178	K.VIQEIVDK.S	472.26	2
							K.AGYSTDESSSSSLHATR.T	585.91	3
							R.YNSSSISSVLK.D	592.792	2
Q9Y5B9	Homo sapiens	FACT complex subunit SPT16	11/1047 residues	0.0105	57	119838	K.AASITSEVFNK.F	583.786	2
Q6PKG0	Homo sapiens	La-related protein 1	8/1096 residues	0.0073	54	123434	K.VVEIVDEK.V	465.746	2
Q6ZSZ5	Homo sapiens	Rho guanine nucleotide exchange factor 18	10/1361 residues	0.0073	43	151549	R.SVPVSFYEIR.S	399.698	3
P78344	Homo sapiens	Eukaryotic translation initiation factor 4 gamma 2	11/907 residues	0.0121	42	102297	R.EWLTELFQQSK.V	704.835	2
P23246	Homo sapiens	Splicing factor, proline- and glutamine-rich	31/707 residues	0.0438	41	76102	R.AVVIVDDR.G	443.739	2
							R.NLSPYVSNELLEEAFSQFGPIER.A	880.737	3
