# Supplementary material for: Relating the composition and interface interactions in the hard corona of gold nanoparticles to the induced response mechanisms in living cells
Source: Royal Society of Chemistry journal article supplement (doi:10.1039/d0nr03581e), 2020-01-01
Supplement: d0nr03581e3.xlsx [file d0nr03581e3.xlsx]

## Sheet: Table S2
Protein summary of the hard corona extracted from A549 cells
Fragment data by excised gel segments are shown in separate worksheets (A549_1-5) corresponding to Figure 1 right green bars low-kDa to high-kDa.
Accession #	Entity	Name
P31947	Homo sapiens	14-3-3 protein sigma
P62277	Homo sapiens	40S ribosomal protein S13
P05387	Homo sapiens	60S acidic ribosomal protein P2
P60709	Homo sapiens	Actin, cytoplasmic 1
P60709	Homo sapiens	Actin, cytoplasmic 1
P06733	Homo sapiens	Alpha-enolase
P04083	Homo sapiens	Annexin A1
P07355	Homo sapiens	Annexin A2
O75531	Homo sapiens	Barrier-to-autointegration factor
P0DP23	Homo sapiens	Calmodulin-1
Q9NZT1	Homo sapiens	Calmodulin-like protein 5
P31944	Homo sapiens	Caspase-14
P29762	Homo sapiens	Cellular retinoic acid-binding protein 1
P23528	Homo sapiens	Cofilin-1
P68104	Homo sapiens	Elongation factor 1-alpha 1
P13639	Homo sapiens	Elongation factor 2
Q01469	Homo sapiens	Fatty acid-binding protein 5
P47929	Homo sapiens	Galectin-7
P04406	Homo sapiens	Glyceraldehyde-3-phosphate dehydrogenase
P11142	Homo sapiens	Heat shock cognate 71 kDa protein
P04792	Homo sapiens	Heat shock protein beta-1
P01966	Bos taurus	Hemoglobin subunit alpha
P22626	Homo sapiens	Heterogeneous nuclear ribonucleoproteins A2/B1
Q96QV6	Homo sapiens	Histone H2A type 1-A
P04908	Homo sapiens	Histone H2A type 1-B/E
Q71UI9	Homo sapiens	Histone H2A.V
Q96A08	Homo sapiens	Histone H2B type 1-A
P33778	Homo sapiens	Histone H2B type 1-B
P62807	Homo sapiens	Histone H2B type 1-C/E/F/G/I
P68431	Homo sapiens	Histone H3.1
P62805	Homo sapiens	Histone H4
P0DOX5	Homo sapiens	Immunoglobulin gamma-1 heavy chain
P01859	Homo sapiens	Immunoglobulin heavy constant gamma 2
P0DOY2	Homo sapiens	Immunoglobulin lambda constant 2
P14923	Homo sapiens	Junction plakoglobin
P00338	Homo sapiens	L-lactate dehydrogenase A chain
Q15233	Homo sapiens	Non-POU domain-containing octamer-binding protein
P62937	Homo sapiens	Peptidyl-prolyl cis-trans isomerase A
P05121	Homo sapiens	Plasminogen activator inhibitor 1
P02545	Homo sapiens	Prelamin-A/C
P31949	Homo sapiens	Protein S100-A11
P31151	Homo sapiens	Protein S100-A7
P05109	Homo sapiens	Protein S100-A8
P06702	Homo sapiens	Protein S100-A9
Q8TF72	Homo sapiens	Protein Shroom3
Q53RT3	Homo sapiens	Retroviral-like aspartic protease 1
Q13501	Homo sapiens	Sequestosome-1
P29508	Homo sapiens	Serpin B3
P48594	Homo sapiens	Serpin B4
Q7RTR8	Homo sapiens	Taste receptor type 2 member 42
P10599	Homo sapiens	Thioredoxin
P68363	Homo sapiens	Tubulin alpha-1B chain
Q13885	Homo sapiens	Tubulin beta-2A chain
P62979	Homo sapiens	Ubiquitin-40S ribosomal protein S27a
P08670	Homo sapiens	Vimentin
Q3ZBS7	Bos taurus	Vitronectin

## Sheet: A549_1
ID	Entity	Name	Sequence coverage		Score	Mass	Peptide	Observed	Charge (+)
P00761	Sus scrofa	Trypsin	38/231 residues	0.1645	614	24394	R.VATVSLPR.S	421.758	2
							K.LSSPATLNSR.V	523.284	2
							R.LGEHNIDVLEGNEQFINAAK.I	738.037	3
							R.LGEHNIDVLEGNEQFINAAK.I	1106.55	2
P62805	Homo sapiens	Histone H4	56/103 residues	0.5437	358	11360	R.DNIQGITKPAIR.R	442.589	3
							R.DAVTYTEHAK.R	567.774	2
							R.DNIQGITKPAIR.R	663.379	2
							K.TVTAMDVVYALKR.Q	489.938	3
							R.ISGLIYEETRGVLK.V	526.631	3
							R.ISGLIYEETR.G	590.813	2
							K.TVTAMDVVYALK.R	655.851	2
							R.TLYGFGG.-	714.343	1
P01966	Bos taurus	Hemoglobin subunit alpha	36/142 residues	0.2535	66	15175	K.VGGHAAEYGAEALER.M	510.917	3
							R.MFLSFPTTK.T	536.28	2
							K.FLANVSTVLTSK.Y	640.363	2
O75531	Homo sapiens	Barrier-to-autointegration factor	36/89 residues	0.4045	41	10052	K.AYVVLGQFLVLK.K	675.409	2
							R.DFVAEPMGEKPVGSLAGIGEVLGK.K	801.083	3
Q8TD26	Homo sapiens	Chromodomain-helicase-DNA-binding protein 6	11/2715 residues	0.0041	40	305220	K.HDRDLLIGTAK.H	413.264	3

## Sheet: A549_2
ID	Entity	Name	Sequence coverage		Score	Mass	Peptide	Observed	Charge (+)
P48594	Homo sapiens	Serpin B4	143/390 residues	0.3667	342	44825	K.STDAYELK.I	463.725	2
							K.AATYHVDR.S	466.733	2
							K.DNTAQQISK.V	502.753	2
							K.VLEIPYK.G	431.256	2
							K.VLHFDQVTENTTEK.A	554.275	3
							K.INSWVESQTNEK.I	717.844	2
							K.FYQTSVESTDFANAPEESR.K	726.99	3
							K.FYQTSVESTDFANAPEESR.K	1089.48	2
							K.TYQFLQEYLDAIKK.F	587.313	3
							K.TYQFLQEYLDAIK.K	816.919	2
							K.FMFDLFQQFR.K	689.834	2
							K.SKENNIFYSPISITSALGMVLLGAK.D	885.478	3
							K.DLSMIVLLPNEIDGLQK.L	950.018	2
P29508	Homo sapiens	Serpin B3	115/390 residues	0.2949	204	44537	K.STDAYELK.I	463.725	2
							K.AATYHVDR.S	466.733	2
							K.VLEIPYK.G	431.256	2
							K.VLHFDQVTENTTGK.A	530.603	3
							K.INSWVESQTNEK.I	717.844	2
							K.TYLFLQEYLDAIKK.F	582.656	3
							K.FMFDLFQQFR.K	689.834	2
							K.SKENNIFYSPISITSALGMVLLGAK.D	885.478	3
							K.DLSMIVLLPNEIDGLQK.L	950.018	2
P00761	Sus scrofa	Trypsin	58/231 residues	0.2511	312	24394	K.LSSPATLNSR.V	523.284	2
							R.VATVSLPR.S	421.757	2
							R.LGEHNIDVLEGNEQFINAAK.I	738.036	3
							K.IITHPNFNGNTLDNDIMLIK.L	762.063	3
P31947	Homo sapiens	14-3-3 protein sigma	47/248 residues	0.1895	256	27757	K.LAEQAER.Y	408.311	2
							R.YLAEVATGDDK.K	591.287	2
							K.DSTLIMQLLR.D	595.334	2
							K.TTFDEAMADLHTLSEDSYK.D	725.324	3
P06702	Homo sapiens	Protein S100-A9	51/114 residues	0.4474	221	13234	R.LTWASHEK.M	486.25	2
							K.LGHPDTLNQGEFK.E	485.911	3
							K.VIEHIMEDLDTNADK.Q	581.613	3
							K.VIEHIMEDLDTNADK.Q	871.913	2
							R.NIETIINTFHQYSVK.L	603.319	3
							R.NIETIINTFHQYSVK.L	903.97	2
P60709	Homo sapiens	Actin, cytoplasmic 1	87/375 residues	0.232	188	41710	K.AGFAGDDAPR.A	488.726	2
							K.DSYVGDEAQSK.R	599.763	2
							K.IWHHTFYNELR.V	506.249	3
							R.GYSFTTTAER.E	566.767	2
							K.EITALAPSTMK.I	581.311	2
							R.VAPEEHPVLLTEAPLNPK.A	652.359	3
							K.SYELPDGQVITIGNER.F	895.947	2
Q9NZT1	Homo sapiens	Calmodulin-like protein 5	82/146 residues	0.5616	185	15883	R.EADVDQDGR.V	502.718	2
							R.AFDQDGDGHITVDELR.R	596.609	3
							R.AGLEDLQVAFR.A	609.825	2
							K.AFSAVDTDGNGTINAQELGAALK.A	755.377	3
							K.LISEVDSDGDGEISFQEFLTAAK.K	824.396	3
P04908	Homo sapiens	Histone H2A type 1-B/E	35/130 residues	0.2692	157	14127	R.NDEELNK.L	431.201	2
							R.AGLQFPVGR.V	472.768	2
							R.VTIAQGGVLPNIQAVLLPK.K	644.728	3
Q96QV6	Homo sapiens	Histone H2A type 1-A	39/131 residues	0.2977	70	14225	R.NDEELNK.L	431.201	2
							R.AGLQFPVGR.I	472.768	2
							K.LLGGVTIAQGGVLPNIQAVLLPK.K	758.132	3
Q71UI9	Homo sapiens	Histone H2A.V	19/128 residues	0.1484	57	13501	R.AGLQFPVGR.I	472.768	2
							R.GDEELDSLIK.A	559.78	2
P0DOX5	Homo sapiens	Immunoglobulin gamma-1 heavy chain	67/449 residues	0.1492	148	49298	K.ALPAPIEK.T	419.754	2
							K.FNWYVDGVEVHNAK.T	559.938	3
							K.GPSVFPLAPSSK.S	593.825	2
							R.VVSVLTVLHQDWLNGK.E	603.673	3
							K.TTPPVLDSDGSFFLYSK.L	625.647	3
P47929	Homo sapiens	Galectin-7	60/136 residues	0.4412	141	15066	K.EQGSWGR.E	410.19	2
							K.AVVGDAQYHHFR.H	467.233	3
							R.LDTSEVVFNSK.E	619.815	2
							R.LVEVGGDVQLDSVR.I	743.397	2
							R.GQPFEVLIIASDDGFK.A	579.3	3
							R.GQPFEVLIIASDDGFK.A	868.45	2
P10599	Homo sapiens	Thioredoxin	13/105 residues	0.1238	110	11730	K.TAFQEALDAAGDK.L	668.821	2
Q01469	Homo sapiens	Fatty acid-binding protein 5	9/135 residues	0.0667	108	15155	K.FEETTADGR.K	513.229	2
P05109	Homo sapiens	Protein S100-A8	18/93 residues	0.1935	77	10828	K.ALNSIIDVYHK.Y	424.901	3
							-.MLTELEK.A	432.229	2
							K.ALNSIIDVYHK.Y	636.85	2
P68104	Homo sapiens	Elongation factor 1-alpha 1	47/462 residues	0.1017	73	50109	K.YYVTIIDAPGHR.D	468.912	3
							K.IGGIGTVPVGR.V	513.307	2
							R.VETGVLKPGMVVTFAPVNVTTEVK.S	839.464	3
P62937	Homo sapiens	Peptidyl-prolyl cis-trans isomerase A	27/165 residues	0.1636	71	18001	R.VSFELFADK.V	528.273	2
							M.VNPTVFFDIAVDGEPLGR.V	973.502	2
P01859	Homo sapiens	Immunoglobulin heavy constant gamma 2	16/326 residues	0.0491	70	35878	R.VVSVLTVVHQDWLNGK.E	599.001	3
Q13885	Homo sapiens	Tubulin beta-2A chain	18/445 residues	0.0404	67	49875	K.GHYTEGAELVDSVLDVVR.K	653.664	3
P62805	Homo sapiens	Histone H4	30/103 residues	0.2913	65	11360	R.DNIQGITKPAIR.R	442.588	3
							R.ISGLIYEETR.G	590.812	2
							K.VFLENVIR.D	495.291	2
P62979	Homo sapiens	Ubiquitin-40S ribosomal protein S27a	16/156 residues	0.1026	64	17953	K.TITLEVEPSDTIENVK.A	596.645	3
							K.TITLEVEPSDTIENVK.A	894.463	2
P0DP23	Homo sapiens	Calmodulin-1	8/149 residues	0.0537	64	16827	K.EAFSLFDK.D	478.738	2
P04792	Homo sapiens	Heat shock protein beta-1	62/205 residues	0.3024	62	22768	R.AQLGGPEAAK.S	471.255	2
							K.DGVVEITGK.H	459.249	2
							R.LFDQAFGLPR.L	582.312	2
							R.VSLDVNHFAPDELTVK.T	595.31	3
							K.LATQSNEITIPVTFESR.A	953.495	2
P68363	Homo sapiens	Tubulin alpha-1B chain	23/451 residues	0.051	60	50120	K.EIIDLVLDR.I	543.313	2
							R.LISQIVSSITASLR.F	744.443	2
P06733	Homo sapiens	Alpha-enolase	46/434 residues	0.106	59	47139	R.GNPTVEVDLFTSK.G	703.86	2
							R.YISPDQLADLYK.S	713.364	2
							K.DYPVVSIEDPFDQDDWGAWQK.F	837.708	3
P04406	Homo sapiens	Glyceraldehyde-3-phosphate dehydrogenase	14/335 residues	0.0418	57	36030	K.LVINGNPITIFQER.D	807.95	2
Q96A08	Homo sapiens	Histone H2B type 1-A	7/127 residues	0.0551	56	14159	R.EIQTAVR.L	408.731	2
Q8TD26	Homo sapiens	Chromodomain-helicase-DNA-binding protein 6	11/2715 residues	0.0041	56	305220	K.HDRDLLIGTAK.H	413.266	3
P11142	Homo sapiens	Heat shock cognate 71 kDa protein	37/646 residues	0.0573	55	70854	K.SQIHDIVLVGGSTR.I	494.605	3
							R.TTPSYVAFTDTER.L	744.352	2
							R.FEELNADLFR.G	627.31	2
P07355	Homo sapiens	Annexin A2	26/339 residues	0.0767	55	38580	R.DALNIETAIK.T	544.302	2
							K.SALSGHLETVILGLLK.T	551.332	3
P00338	Homo sapiens	L-lactate dehydrogenase A chain	34/332 residues	0.1024	54	36665	K.VTLTSEEEAR.L	567.784	2
							K.LVIITAGAR.Q	457.294	2
							K.DLADELALVDVIEDK.L	829.428	2
P31949	Homo sapiens	Protein S100-A11	9/105 residues	0.0857	51	11733	K.DGYNYTLSK.T	530.749	2
Q53RT3	Homo sapiens	Retroviral-like aspartic protease 1	13/343 residues	0.0379	46	36968	K.ILGVWDTAVSLGK.L	679.887	2
P29762	Homo sapiens	Cellular retinoic acid-binding protein 1	7/137 residues	0.0511	45	15556	R.TTEINFK.V	426.728	2
P31151	Homo sapiens	Protein S100-A7	30/101 residues	0.297	45	11464	K.GTNYLADVFEK.K	628.809	2
							K.IDFSEFLSLLGDIATDYHK.Q	729.03	3
P0DOY2	Homo sapiens	Immunoglobulin lambda constant 2	25/106 residues	0.2358	45	11287	K.GTNYLADVFEK.K	628.809	2
							K.IDFSEFLSLLGDIATDYHK.Q	729.03	3
P05387	Homo sapiens	60S acidic ribosomal protein P2	12/115 residues	0.1043	44	11658	K.NIEDVIAQGIGK.L	628.843	2
P13639	Homo sapiens	Elongation factor 2	11/858 residues	0.0128	43	95277	R.VFSGLVSTGLK.V	554.322	2
P14923	Homo sapiens	Junction plakoglobin	18/745 residues	0.0242	42	81693	K.SAIVHLINYQDDAELATR.A	677.35	3
P22626	Homo sapiens	Heterogeneous nuclear ribonucleoproteins A2/B1	10/353 residues	0.0283	41	37407	K.IDTIEIITDR.Q	594.826	2
P04083	Homo sapiens	Annexin A1	15/346 residues	0.0434	40	38690	K.ALTGHLEEVVLALLK.T	535.992	3
P31944	Homo sapiens	Caspase-14	11/242 residues	0.0455	40	27662	K.LENLFEALNNK.N	652.843	2
P23528	Homo sapiens	Cofilin-1	11/166 residues	0.0663	40	18491	R.YALYDATYETK.E	669.314	2

## Sheet: A549_3
ID	Entity	Name	Sequence coverage		Score	Mass	Peptide	Observed	Charge (+)
P00761	Sus scrofa	Trypsin	58/231 residues	0.2511	656	24394	K.LSSPATLNSR.V	523.286	2
							R.VATVSLPR.S	421.757	2
							R.LGEHNIDVLEGNEQFINAAK.I	738.04	3
							R.LGEHNIDVLEGNEQFINAAK.I	1106.05	2
							K.IITHPNFNGNTLDNDIMLIK.L	761.73	3
P13645	Homo sapiens	Keratin, type I cytoskeletal 10	150/584 residues	0.2568	379	58792	R.LASYLDK.V	405.224	2
							K.YENEVALR.Q	497.252	2
							R.LAADDFR.L	404.203	2
							K.SEITELR.R	424.229	2
							R.VLDELTLTK.A	516.302	2
							R.LENEIQTYR.S	583.294	2
							R.ALEESNYELEGK.I	691.327	2
							K.GSLGGGFSSGGFSGGSFSR.G	854.889	2
							K.ELTTEIDNNIEQISSYK.S	998.986	2
							R.NVQALEIELQSQLALK.Q	599.675	3
							K.NQILNLTTDNANILLQIDNAR.L	789.758	3
							R.NVQALEIELQSQLALK.Q	899.007	2
							K.ADLEMQIESLTEELAYLK.K	699.353	3
P04264	Homo sapiens	Keratin, type II cytoskeletal 1	113/644 residues	0.1755	266	65978	R.SLVNLGGSK.S	437.752	2
							K.IEISELNR.V	487.27	2
							K.YEELQITAGR.H	590.303	2
							R.TNAENEFVTIK.K	633.32	2
							K.LNDLEDALQQAK.E	679.351	2
							K.SLNNQFASFIDK.V	692.348	2
							R.FLEQQNQVLQTK.W	738.395	2
							K.LALDLEIATYR.T	639.628	2
							R.SLDLDSIIAEVK.A	651.86	2
							R.THNLEPYFESFINNLR.R	665.33	3
P62807	Homo sapiens	Histone H2B type 1-C/E/F/G/I	33/126 residues	0.2619	214	13898	R.EIQTAVR.L	408.733	2
							K.HAVSEGTK.A	414.271	2
							R.LLLPGELAK.H	477.304	2
							K.ESYSVYVYK.V	569.276	2
P33778	Homo sapiens	Histone H2B type 1-B	33/126 residues	0.2619	193	13942	R.EIQTAVR.L	408.733	2
							K.HAVSEGTK.A	414.271	2
							R.LLLPGELAK.H	477.304	2
							K.ESYSIYVYK.V	576.284	2
P68431	Homo sapiens	Histone H3.1	14/136 residues	0.1029	63	15394	R.EIAQDFK.T	425.719	2
							K.STELLIR.K	416.249	2
Q8TD26	Homo sapiens	Chromodomain-helicase-DNA-binding protein 6	11/2715 residues	0.0041	55	305220	K.HDRDLLIGTAK.H	413.266	3
P62277	Homo sapiens	40S ribosomal protein S13	7/151 residues	0.0464	46	17212	R.LILIESR.I	422.267	2
Q7RTR8	Homo sapiens	Taste receptor type 2 member 42	7/314 residues	0.0223	45	36171	K.LRQTAVR.L	422.731	2

## Sheet: A549_4
ID	Entity	Name	Sequence coverage		Score	Mass	Peptide	Observed	Charge (+)
P00761	Sus scrofa	Trypsin	58/231 residues	0.2511	690	24394	K.LSSPATLNSR.V	523.287	2
							R.VATVSLPR.S	421.759	2
							R.LGEHNIDVLEGNEQFINAAK.I	738.041	3
							R.LGEHNIDVLEGNEQFINAAK.I	1106.55	2
							K.IITHPNFNGNTLDNDIMLIK.L	762.065	3
P60709	Homo sapiens	Actin, cytoplasmic 1	90/375 residues	0.24	383	41710	K.AGFAGDDAPR.A	488.729	2
							K.DSYVGDEAQSK.R	599.765	2
							K.IWHHTFYNELR.V	505.921	3
							R.GYSFTTTAER.E	566.767	2
							K.EITALAPSTMK.I	581.314	2
							K.SYELPDGQVITIGNER.F	597.634	3
							K.SYELPDGQVITIGNER.F	895.948	2
							K.DLYANTVLSGGTTMYPGIADR.M	739.364	3
							K.DLYANTVLSGGTTMYPGIADR.M	1108.54	2
P68104	Homo sapiens	Elongation factor 1-alpha 1	11/462 residues	0.0238	84	50109	K.IGGIGTVPVGR.V	513.31	2
Q8TD26	Homo sapiens	Chromodomain-helicase-DNA-binding protein 6	11/2715 residues	0.0041	51	305220	K.HDRDLLIGTAK.H	413.267	3
Q8TF72	Homo sapiens	Protein Shroom3	9/1996 residues	0.0045	42	216724	R.SSPATADKR.Q	466.744	2
P05121	Homo sapiens	Plasminogen activator inhibitor 1	10/402 residues	0.0249	42	45031	R.VFQQVAQASK.D	553.303	2

## Sheet: A549_5
ID	Entity	Name	Sequence coverage		Score	Mass	Peptide	Observed	Charge (+)
P08670	Homo sapiens	Vimentin	245/466 residues	0.5258	678	53619	R.SVSSSSYR.R	436.71	2
							K.GTNESLER.Q	453.221	2
							R.SYVTTSTR.T	457.734	2
							K.LLEGEESR.I	466.739	2
							R.QDVDNASLAR.L	544.773	2
							R.DGQVINETSQHHDDLE.-	613.273	3
							R.FANYIDK.V	435.722	2
							R.TYSLGSALRPSTSR.S	499.267	3
							K.LQEEMLQR.E	523.77	2
							K.FADLSEAANR.N	547.268	2
							K.VELQELNDR.F	558.288	2
							R.LQDEIQNMK.E	559.78	2
							R.EYQDLLNVK.M	561.294	2
							R.LGDLYEEEMR.E	627.786	2
							K.NLQEAEEWYK.S	655.306	2
							R.EEAENTLQSFR.Q	662.312	2
							R.SLYASSPGGVYATR.S	714.86	2
							R.EMEENFAVEAANYQDTIGR.L	729.992	3
							R.KVESLQEEIAFLK.K	511.954	3
							R.ISLPLPNFSSLNLR.E	524.304	3
							K.MALDIEIATYR.K	648.334	2
							K.VESLQEEIAFLK.K	703.381	2
							R.LLQDSVDFSLADAINTEFK.N	709.693	3
							R.ISLPLPNFSSLNLR.E	785.95	2
							R.LLQDSVDFSLADAINTEFK.N	1064.03	2
P00761	Sus scrofa	Trypsin	56/231 residues	0.2424	591	24394	K.LSSPATLNSR.V	523.286	2
							R.VATVSLPR.S	421.759	2
							R.LGEHNIDVLEGNEQFINAAK.I	738.038	3
							R.SCAAAGTECLISGWGNTK.S	884.394	2
P02545	Homo sapiens	Prelamin-A/C	74/664 residues	0.1114	140	74095	R.LVEIDNGK.Q	444.246	2
							K.LEAALGEAK.K	451.254	2
							R.SLETENAGLR.L	545.775	2
							R.VAVEEVDEEGK.F	602.793	2
							R.LAVYIDR.V	425.245	2
							R.LADALQELR.A	514.789	2
							K.EAALSTALSEK.R	560.299	2
							K.DLEALLNSK.E	501.776	2
Q13501	Homo sapiens	Sequestosome-1	29/440 residues	0.0659	93	47657	R.LTPVSPESSSTEEK.S	745.866	2
							K.NYDIGAALDTIQYSK.H	836.411	2
Q3ZBS7	Bos taurus	Vitronectin	27/484 residues	0.0558	57	54065	R.FQDGVLEPDFPR.N	710.343	2
							R.DVWGIEGPIDAAFTR.V	823.909	2
Q8TD26	Homo sapiens	Chromodomain-helicase-DNA-binding protein 6	11/2715 residues	0.0041	51	305220	K.HDRDLLIGTAK.H	413.267	3
Q15233	Homo sapiens	Non-POU domain-containing octamer-binding protein	8/471 residues	0.017	46	54197	R.AVVIVDDR.G	443.755	2
